1 Catheterized-bladder environment induces hyphal *Candida albicans* formation, promoting fungal  
2 colonization and persistence.

3

4 Alyssa A. La Bella, Marissa J. Andersen, Alex Molesan, Peter V. Stuckey, Felipe H. Santiago-  
5 Tirado\*, & Ana L. Flores-Mireles\*

6

7 Department of Biological Sciences, University of Notre Dame, Notre Dame, IN, USA

8 \*Address correspondence to Ana L. Flores-Mireles (ALFM), [afloresm@nd.edu](mailto:afloresm@nd.edu),  
9 and Felipe H. Santiago-Tirado(FHST), [fsantiago@nd.edu](mailto:fsantiago@nd.edu)

10

11

12 Mailing address: 351 Galvin Life Science Center, Notre Dame, IN 46556, USA. Phone: (574)  
13 631-4964 (ALFM) and (574) 631-4096 (FHST).

14

15

16

17

18

19

20 **Short title:** *Candida*-fibrinogen interactions are critical for CAUTI

21

22

23 **Key words:** *C. albicans*; CAUTI; UTI; fibrinogen; fibrin; filamentation; hyphae; biofilm; urine;  
24 bladder; catheter; candiduria; fungi;

25

26

27 **ABSTRACT**

28 Catheter-associated urinary tract infections (CAUTIs) are a serious public health problem and  
29 account for approximately 40% of hospital-acquired infections worldwide. *Candida spp* are a  
30 major causative agent of CAUTI (17.8%) – specifically *Candida albicans*– that has steadily  
31 increased to become the second most common CAUTI uropathogen<sup>1</sup>. Yet, there is poor  
32 understanding of the molecular details of how *C. albicans* attaches, grows in the bladder, forms  
33 biofilms, survives, and persists during CAUTI<sup>2</sup>. Understanding of the mechanisms that contribute  
34 to CAUTI and invasive fungal infection will give insights into the development of more effective  
35 therapies, which are needed due to the spread of antifungal resistance and complex management  
36 of CAUTI in patients that require a urinary catheter<sup>3</sup>. Here, we characterize the ability of five  
37 *Candida albicans* clinical and laboratory strains to colonize the urinary catheter, grow and form  
38 biofilm in urine, and their ability to cause CAUTIs using our mouse model. Analysis of *C. albicans*  
39 strains revealed that growth in urine promotes morphological transition from yeast to hyphae,  
40 which is important for invasive infection. Additionally, we found that biofilm formation was  
41 dependent on the presence of fibrinogen, a protein released on the bladder to promote bladder  
42 healing<sup>4,5</sup>. Furthermore, deletion of hyphae regulatory genes resulted in defective bladder and  
43 catheter colonization and abolished dissemination. These results indicate that novel antifungal  
44 therapies preventing the morphological transition of *C. albicans* from yeast to hyphae have  
45 considerable promise for the treatment of fungal CAUTIs.

46

47

48

49

## 50 INTRODUCTION

51 Fungal infections and diseases have become a serious public health concern. *Candida*,  
52 *Aspergillus*, and *Cryptococcus spp.* are among the most prominent fungal pathogens contributing  
53 to mycoses-related deaths<sup>6,7</sup>. Of these pathogens, *Candida spp.* is the prevailing opportunistic  
54 pathogen in addition to being the fourth most common hospital-acquired bloodstream infection  
55 (candidemia) in the United States<sup>6,8</sup>. More specifically, *Candida albicans* is the main contributor  
56 to invasive candidiasis, responsible for 50% to 70% of candidiasis cases<sup>6,8</sup>. As *Candida spp.* are  
57 becoming increasingly resistant to antifungal therapy<sup>9</sup>, the management of this fungal pathogen is  
58 a major challenge for the medical community<sup>8</sup>.

59 *C. albicans* inhabits the gastrointestinal and genitourinary tracts and mucosal membranes  
60 along with forming biofilms on dentures, pacemakers, prosthetic joints, and intravenous and  
61 urinary catheters<sup>10-12</sup>. The 2016 National Healthcare Safety Network (NHSN) review found that  
62 *Candida spp.*, specifically *Candida albicans*, have become the second most prevalent uropathogen  
63 causing 17.8% of catheter associated urinary tract infections (CAUTIs)<sup>1</sup>. CAUTIs are the most  
64 common hospital-acquired infection (HAI) with more than 150 million individuals acquiring such  
65 an infection each year<sup>13,14</sup>. The use of catheters and subsequent infections are not limited to  
66 hospital-care settings. In long-term care facilities such as skilled nursing facilities (SNF), 12.6%  
67 of admitted patients use an indwelling catheter. Further, in nursing homes, 11.9% of residents use  
68 indwelling catheters<sup>15</sup>, and ~50% of nursing home residents with indwelling urinary catheters will  
69 experience symptomatic CAUTIs<sup>16</sup>. Despite *Candida spp.* prevalence in CAUTIs, we lack a clear  
70 understanding of the factors required for *Candida* pathogenesis during CAUTIs<sup>1,2</sup>.

71 *C. albicans*, among other fungal species, can grow in yeast, pseudohyphal, and hyphal  
72 morphologies<sup>17-19</sup>. The pseudohyphal and hyphal form have a filamentous structure with the

73 pseudohyphae containing constrictions at sites of septation and hyphae having long tube-like  
74 filaments with no constrictions at the site of septation. *C. albicans*' ability to undergo  
75 morphological changes is a virulence determinant. The hyphae morphology is critical in the spread  
76 of infection and results in *Candida* becoming virulent. When *C. albicans* is in its hyphae  
77 morphology, it can invade epithelial and endothelial cells, resulting in tissue damage and an  
78 invasive infection. *C. albicans* can be converted to its hyphae form via serum, neutral pH, and  
79 other environmental conditions such as CO<sub>2</sub>, and is controlled by the master regulator Enhanced  
80 filamentous growth protein 1 (Efg1), among other transcription factors<sup>20</sup>.

81 The switch between yeast and hyphal forms is essential to pathogenesis and biofilm  
82 formation<sup>10,19-22</sup>. Most *C. albicans* infections are associated with biofilm formation, making  
83 biofilm formation one of the main virulence traits of candidiasis. The biofilm initiates with the  
84 adherence of yeast cells to a surface, forming microcolonies followed by proliferation of hyphae  
85 and pseudohyphae<sup>21</sup>. Maturation of the biofilm occurs when the hyphal scaffold is encased in an  
86 extracellular polysaccharide matrix, other carbohydrates, proteins, nucleic acids and lipids<sup>23,24</sup>.  
87 The final step in biofilm formation involves dispersion of non-adherent yeast cells for  
88 establishment of colonization and biofilms into the surrounding environment<sup>21</sup>. The resulting  
89 biofilm poses a serious threat to the host as the biofilm cells grow increasingly resistant to  
90 antifungal therapy and can evade protection from the host defenses<sup>24</sup>. New antifungal treatments,  
91 such as the echinocandins, that target the  $\beta$ -1,3 glucan component of the cell wall have proven to  
92 successfully prevent *C. albicans* biofilms<sup>11,25</sup>; unfortunately, recently echinocandin-resistant  
93 *Candida spp* are emerging<sup>26,27</sup>.

94 Candiduria (*Candida* in urine) is primarily associated with patients with predisposing  
95 factors including diabetes mellitus, genitourinary structural abnormalities, diminished renal

96 function, renal transplantations, metabolic abnormalities, and indwelling urinary tract catheters or  
97 devices<sup>28</sup>. *C. albicans* colonization and overgrowth in different infection models have been  
98 associated with dysbiosis in the host environment such as alterations in host immunity, stress, and  
99 resident microbiota<sup>10</sup>. Importantly, urinary catheterization disrupts the bladder homeostasis,  
100 mechanically compromising the integrity of the urothelium, inducing inflammation, interfering  
101 with normal micturition (voiding)<sup>29</sup>, and disrupting host defenses in the bladder<sup>30-32</sup>. Hence, we  
102 are interested in understanding how these host environment changes, specifically in the bladder,  
103 can promote fungal CAUTI.

104         The inflammation response caused by catheterization exposes cryptic epithelial receptors  
105 or recruits host factors that can be recognized by the pathogen, enabling microbial colonization,  
106 multiplication, and persistence within the urinary tract<sup>30-33</sup>. We have found that one of these factors  
107 is fibrinogen (Fg), which is released into the bladder to heal damage tissue and prevent bleeding  
108 due to catheter-induced inflammation in both mice and humans<sup>5,34,35</sup>. However, due to the constant  
109 mechanical damage caused by the urinary catheter, Fg accumulates in the bladder and deposits  
110 onto the catheter at concentrations that increase with prolonged catheterization<sup>5,34,36-38</sup>. This Fg is  
111 used by *Enterococcus faecalis* and *Staphylococcus aureus* for colonization of catheters and the  
112 bladder through the adhesins Ebp and ClfB, respectively; blocking this interaction resulted in  
113 defective to no colonization<sup>34,36,39</sup>. Similarly, we have found that in *Acinetobacter baumannii* and  
114 *Proteus mirabilis* CAUTI, interactions with Fg are important<sup>40,41</sup>; however, the bacterial factors  
115 responsible have not yet been described. Consistently, in an *ex vivo* study we showed that a *C.*  
116 *albicans* CAUTI isolate binds to urinary catheters via Fg<sup>5</sup>. This strongly suggests that urine is  
117 inducing changes in the expressed Fg-binding adhesins, prompting us to study this interaction  
118 more carefully in *C. albicans*.

119 In this study, we characterized five *C. albicans* clinical and laboratory strains' growth in  
120 urine, biofilm formation, and capability to cause CAUTI. We found that for the *C. albicans* strains  
121 that grew poorly in urine, growth was promoted when supplemented with a nitrogen source. Urine  
122 itself promoted morphological changes, and biofilm formation was enhanced by the presence of  
123 protein and Fg in urine conditions. Furthermore, *C. albicans* was able to infect the catheterized  
124 bladder and form a biofilm on the urinary catheter; importantly, a hyphae-deficient mutant was  
125 unable to cause CAUTI, suggesting that filamentation was critical for this infection model. Based  
126 on these findings, we conclude that the morphological change of *C. albicans*, which is promoted  
127 by urine and the catheterized environment, is crucial to colonize, persist, and cause CAUTIs.

128

## 129 **RESULTS**

### 130 ***C. albicans* survives and grows in urine.**

131 *C. albicans* is able to infect a wide range of human sites including oropharyngeal, gastrointestinal,  
132 intra-abdominal, skin, genital, and urinary tract, demonstrating its plasticity to survive and  
133 replicate in different host environments<sup>42,10,11,13,14,20</sup>. Since *C. albicans* has become a prominent  
134 CAUTI pathogen, we explored its ability to grow in urine using clinical and laboratory strains. We  
135 used three urinary clinical isolates Pt62, Pt65, and PCNL1<sup>5,43</sup> (obtained from Washington  
136 University School of Medicine) and two well-characterized laboratory strains, DAY230 and  
137 SC5314 (**Table S3**). Since hyphal formation is important for promoting disease, we used a hyphae  
138 defective mutant in the SC5314 background, *efg-1Δcph-1Δ*, to test whether hyphal formation is  
139 important in the catheterized bladder environment (**Table S3**). We tested their ability to grow in a  
140 variety of environments ranging from nutrient rich to restrictive conditions. For rich environment,  
141 we used yeast extract peptone dextrose (YPD) and brain and heart infusion (BHI) in shaking and

142 static conditions; YPD is a standard *C. albicans* growth media and BHI was used since the clinical  
143 strains were isolated on this media. Static growth was used to mimic the bladder environment and  
144 shaking growth was used as a comparison with standard lab culture conditions. For restrictive  
145 environment, we used human urine and to further mimic the plasma protein extravasation in the  
146 catheterized bladder<sup>37</sup>, urine was supplemented with either 3% human serum or different nitrogen  
147 sources including amino acids (AA), bovine serum albumin (BSA), or Fg. Serum albumin and Fg  
148 are two of the most abundant host proteins on catheters retrieved from human and mice and have  
149 shown to be used by other uropathogens as a nutrient source<sup>34,36</sup>. Samples were taken at 0 hours,  
150 24 hours, and 48 hours to assess growth by enumeration of colony forming units (CFUs). As  
151 expected, *C. albicans* clinical and laboratory strains grow in higher densities in rich media and  
152 aeration while growth in rich media in static conditions was similar to the urine conditions (**Fig.**  
153 **1**). In restrictive environment, *C. albicans* strains were able to survive and replicate in urine, but it  
154 varied widely between the strains and supplementation. Human serum supplementation promoted  
155 growth of all strains by 24 hrs with a subsequent decline, possibly because all nutrients were  
156 consumed (**Fig. 1**). The growth of the lab strains and Pt62 was not enhanced, or was inhibited,  
157 with BSA or Aa supplementation when compared with urine alone (**Fig. 1A, D-F**). However, Fg  
158 enhanced growth of all strains, at different magnitudes when compared with urine alone (**Fig. 1**),  
159 except for PNCL1, which already exhibited good growth in urine alone (**Fig. 1C**).

160

### 161 **Urine conditions promotes *C. albicans* hyphal formation.**

162 Environmental conditions induce *C. albicans* morphological changes that are associated with  
163 virulence<sup>10,19</sup>. *C. albicans* can exhibit different morphologies<sup>21</sup>, but the main ones are vegetative  
164 yeast, pseudohyphae, and hyphae<sup>19</sup>. Hyphae morphology leads to the spread of infection and

165 increased virulence of the pathogen<sup>20,22</sup>. Therefore, we wanted to determine how the bladder  
166 environment affects *C. albicans* morphology. To assess the pathogen morphologies, *C. albicans*'  
167 laboratory and clinical strains were grown in urine with 3% human serum to mimic plasma protein  
168 extravasation in the catheterized bladder<sup>37,38</sup>. YPD alone was used as a negative control and when  
169 supplemented with serum was used as a positive control for inducing hyphal morphology<sup>44-46</sup>.  
170 Strains were incubated at 37°C with 5% CO<sub>2</sub> for 48 hrs and samples were collected at 0, 24, and  
171 48 hours. *C. albicans* strains were stained with calcofluor white to assess morphology using  
172 fluorescence microscopy (Zeiss Axio Observed inverted scope). The cell morphology was  
173 analyzed automatically using CellProfiler software (available from the Broad Institute at  
174 [www.cellprofiler.org](http://www.cellprofiler.org))<sup>47</sup> to quantify the percentages of yeast, pseudohyphal, or hyphal forms  
175 based on the circularity value of each outlined cell (**Fig. 2G, Table S1**). All strains showed  
176 predominantly yeast morphology in YPD media and YPD with serum induced pseudohyphal and  
177 hyphal formation in all strains, except Pt65 and SC5314 *efg-1Δcph-1Δ*. Notably, our analysis  
178 showed that urine conditions promote pseudohyphal and hyphal formation in all strains (**Fig. 2,**  
179 **Table S1**) except SC5314 *efg-1Δcph-1Δ* (**Fig. 2F, Table S1**). Pseudohyphal and hyphal  
180 morphologies were further induced when urine was supplemented with human serum in Pt62,  
181 PNCL1, DAY230, and SC45314 but not in Pt65. This suggests that the catheterized environment  
182 triggers *C. albicans* morphological change from the yeast cell form to hyphae.

183

#### 184 **Fibrinogen enhances *C. albicans*' biofilm formation.**

185 Scanning electron microscopy analyses of *C. albicans* biofilms on urinary catheters from CAUTI  
186 patients<sup>2,43</sup> and rats<sup>48,49</sup> have revealed pseudohyphal and hyphal morphology. During candidiasis,  
187 *C. albicans* pseudohyphal and hyphal formation induces expression of virulence genes including



188 host adhesion factors<sup>18,21,50,51</sup>. One of those factors is Mp58, a Fg-binding protein<sup>4,52</sup>. In an *ex-vivo*  
189 study, we showed that *C. albicans* PNCL1 clinical isolate colocalized with Fg-deposited on urinary  
190 catheters retrieved from a patient with preoperative negative urine culture<sup>5</sup>. Fg deposition has been  
191 shown to be a platform for biofilm formation by diverse uropathogens<sup>5,34,36,41,53</sup>, suggesting that  
192 Fg may be an important factor to promote *C. albicans* CAUTI pathogenesis. Based on these and  
193 our previous findings (**Fig. 2**), we hypothesized that urine conditions induce factors responsible  
194 for Fg-binding and biofilm formation. Thus, we assessed biofilm formation under rich (YPD and  
195 BHI) and restrictive conditions (human urine) and compared between BSA- and Fg-coated  
196 microplates as we have previously described<sup>54</sup>. At 48 hrs, immunostaining analyses were  
197 performed to assess fungal biofilm formation by using anti-*Candida* antibodies and biofilm  
198 biomass was quantified by fluorescence intensity<sup>54</sup>. We found that for the clinical strains, Fg  
199 promoted biofilm formation in all conditions but Fg-dependent biofilm formation was further  
200 enhanced in human urine condition (**Fig. 3A-C**). For the laboratory strains, we found a similar  
201 Fg-dependent biofilm formation in YPD, BHI, and urine, but Fg had no effect in DAY230 when  
202 grown in BHI (**Fig. 3D and E**). In contrast, SC5314 *efg-1Δcph-1Δ* was not able to form biofilms  
203 in human urine regardless of the coated surface (**Fig. 3F**), highlighting the importance of  
204 filamentation for biofilms under urine conditions. Notably, we observed that the hyphae-defective  
205 mutant was able to form Fg-dependent biofilms in YPD and BHI (**Fig. 3F**), suggesting that the  
206 mechanisms of biofilm formation are different. This difference could be related to adhesins that  
207 are expressed during yeast form that may contribute to biofilm but not in urine conditions.  
208 Therefore, using conditions that closely mimic the *in vivo* environment are important to identify  
209 physiologically-relevant determinants for biofilm formation.

211 **Fibrinogen promotes *C. albicans* biofilm formation.**

212 Furthermore, we analyzed the *C. albicans* strains biofilm by immunofluorescence (IF) microscopy.  
213 *C. albicans* strains' biofilms were grown for 48 hrs in human urine using glass-bottom petri dishes  
214 coated with BSA or Fg. Biofilms on BSA were barely monolayers or small aggregates composed  
215 of yeast, pseudohyphae, and hyphae (**Fig. 3G-K**), except for SC5314 *efg-1Δcph-1Δ*, where all  
216 cells were in yeast form (**Fig. 3L**). On the other hand, Fg promoted a robust biofilm in all strains  
217 when compared with BSA-dependent biofilms (**Fig. 3G-K**); except for the hyphae-deficient  
218 mutant where the colonization was composed of small yeast aggregates similar to the colonization  
219 on BSA-coated surfaces (**Fig. 3L**), suggesting filamentation is important for Fg-dependent biofilm  
220 formation.

221 Furthermore, in the damaged tissue environment, like the catheterized bladder, Fg is  
222 converted into fibrin fibers or nets to stop bleeding and allow healing. Therefore, we explored the  
223 fungal-fibrin interactions *in vitro*. Fibrin fibers and nets were formed in glass-bottom petri dishes  
224 by adding thrombin to soluble Fg and incubating at 37°C for an hour; then, *C. albicans* strains  
225 were added and incubated for 48 hrs at 37°C in human urine. Visualization of the interaction was  
226 done by confocal microscopy and 3D reconstruction at 10x and 40x. We found that most of the  
227 cells had a pseudohyphal and hyphal morphology surrounding and going through the fibrin fibers  
228 and nets (**Fig. 4A-E**), except for SC5314 *efg-1Δcph-1Δ* (**Fig. 3F**).

229

230 ***C. albicans* hyphal formation is critical for establishment of CAUTI.**

231 Based on our previous results, we hypothesized that a hyphae-deficient mutant of *C. albicans*  
232 would have a defective colonization in the catheterized bladder. To test this, we assessed the ability  
233 of the clinical and laboratory strains to colonize and form biofilm on the urinary catheter using our

234 established CAUTI mouse model<sup>34,36-41,55-57</sup>. Furthermore, to get a better understanding of the  
235 contribution of the catheterized bladder environment to *C. albicans*' colonization, we carried out  
236 infections in catheterized and non-catheterized mice. Mice with or without catheters were  
237 challenged with  $1 \times 10^6$  CFU of each strain grown in YPD media overnight at 37°C under static  
238 conditions. After 24 hours post infection (hpi), the mice were euthanized and their organs and  
239 catheters (when catheterized) were harvested to quantify colonization by CFU enumeration. The  
240 results showed that catheterization significantly increased colonization on the bladder of Pt62,  
241 Pt65, PNCL1, DAY230 and SC5314 and the catheter and bladder were colonized to the same  
242 extent (**Fig. 5**). Importantly, we found that the hyphae-deficient mutant, SC5314 *efg-1Δcph-1Δ*,  
243 had a significantly defective bladder and catheter colonization when compared with the SC5314  
244 wild-type (WT) strain (p-value < 0.005; **Fig. 5E**). Interestingly, in the absence of a catheter, the  
245 hyphae-deficient mutant behaved and colonized to the same extent as the WT strain.

246 In human infection, the incidence of candidemia and systemic dissemination arising from  
247 *Candida* UTI or candiduria *Candida* in urine are relatively low (1-8% of all candidemia cases)<sup>58</sup>.  
248 However, the prevalence of candidemia due to candiduria increases in critically ill and  
249 immunocompromised patients<sup>59,60</sup>, especially if the patients are undergoing urinary  
250 catheterization<sup>61</sup>. Since our mouse model of CAUTI allows us to assess dissemination, we  
251 analyzed fungal burden of kidneys, spleen, and heart after 24 hpi (**Fig. 5**). We found that urinary  
252 catheterization significantly contributes to the fungal spread of DAY230 to the kidneys and  
253 spleens (p-value < 0.05; **Fig. 5D**) and in SC5314, spreads to the kidneys (p-value < 0.005; **Fig.**  
254 **5E**). Additionally, colonization of the kidneys by Pt62 and Pt65 was 2-3 logs higher than non-  
255 catheterized mice, trending to significance. Furthermore, the hyphae-deficient mutant, SC5314  
256 *efg-1Δcph-1Δ*, did not show differential dissemination between catheterized and non-catheterized

257 mice (**Fig. 5E**). This data showed that the changes induced by the presence of a catheter are  
258 necessary for fungal colonization of the urinary tract and further demonstrate that hyphal  
259 morphology as well as pathways regulated by *efg-1* and *cph-1* are crucial for establishment of  
260 CAUTI.

261

262 **Interactions with fibrinogen and hyphal morphology are important for *C. albicans***  
263 **colonization the catheterized bladder.**

264 To further understand the *C. albicans*' morphology, its interaction with Fg, and its spatial  
265 colonization in the bladder during CAUTI, we performed histological analyses using hematoxylin  
266 and eosin (H&E) staining, and also IF microscopy of 24 hpi implanted and infected bladders with  
267  $1 \times 10^6$  CFU of each *C. albicans* strain. For the IF analysis, we stained for *C. albicans* (red), Fg  
268 (green), and for neutrophils (white) (**Fig. 6**, merge images; **Fig. S1-S6**, single channels). We  
269 focused on neutrophils for two reasons: we have shown they are highly recruited into the  
270 catheterized bladder<sup>37,38,62</sup> and the fact that neutropenic patients are more susceptible to *C. albicans*  
271 and bacterial dissemination from CAUTI<sup>59,63-65</sup>, suggesting a role in controlling candidemia from  
272 candiduria. We found that bladder colonization was so robust that it was visible in the H&E-  
273 stained whole bladders (blue arrow heads) (**Fig. 6**). Consistently, our IF analysis showed the  
274 presence of *C. albicans*' hyphal and pseudohyphal morphologies in the lumen of the bladder in all  
275 clinical and laboratory strains (**Fig 6A-D**), except for the hyphal mutant, SC5314 *efg-1* $\Delta$ *cph-1* $\Delta$   
276 (**Fig. 6F**). As seen with other uropathogens, including *E. faecalis*, *S. aureus*, *A. baumannii*, and *P.*  
277 *mirabilis*<sup>5,34,36,40,41,53</sup>, *C. albicans* cells in the catheterized bladder are found in close association  
278 with Fg (**Fig. 6** and **Fig. S1-S6**).

279           Importantly, neutrophils were highly recruited into the bladder, specifically in the areas  
280 with fungal colonization (**Fig. 6** and **Fig. S1-S6**). We found that *C. albicans* breached the  
281 urothelium, encountering a strong neutrophil response at the site of entry (**Fig. 6C-E** and **Fig. S3-**  
282 **S4**). For example, we found that PNCL1 was able to reach the bladder lamina propria, inducing a  
283 massive neutrophil recruitment to contain the infection (**Fig. 6C** and **Fig. S3**). Pt62 and Pt65 cells  
284 were primarily found on the bladder lumen and the fungal cells were interacting with Fg and  
285 neutrophils (**Fig. 6A-B** and **Fig. S3-S4**). On the other hand, robust fungal colonization and  
286 neutrophil recruitment was not observed in the SC5314 *efg-1Δcph-1Δ* infected bladder (**Fig. 6F**  
287 and **Fig. S6**). These data demonstrate that in the catheterized bladder, *C. albicans* is mostly in  
288 hyphal and pseudohyphal morphology and it is able to interact with Fg. Furthermore, neutrophils  
289 are recruited to control fungal infection.

290

#### 291 ***C. albicans* interacts with deposited fibrinogen on the catheter during CAUTI.**

292 Based on our *in vitro* Fg-binding results, we assessed if *C. albicans*-Fg interaction occurs *in vivo*  
293 on the catheter during CAUTI. Catheters from mice infected with each strain were retrieved 24  
294 hpi and immunostained for *C. albicans* (red) and Fg (green). Except for the hyphal mutant, we  
295 found that all strains form a robust biofilm on the implanted catheter (**Fig. 7**), colonizing 59% to  
296 79% of the surface of the catheter (**Table S2**). SC5314 WT showed  $78.9 \pm 14\%$  colonization of  
297 the catheters while SC5314 *efg-1Δcph-1Δ* catheters' colonization was  $10.4 \pm 7.5\%$ , exhibiting a  
298 significant defective colonization (**Fig. 7F-G, L; Table S2**). Our IF analysis showed that *C.*  
299 *albicans* strains were preferentially binding onto deposited Fg on the catheter (**Fig. 7B-G**). We  
300 then further quantified the percentage of the catheter-colonizing fungal population that was  
301 colocalizing with Fg. We found that 75% to 91% of the *C. albicans* strains' staining was

302 colocalized with deposited Fg (**Fig. 7H-L**). Moreover, in the SC5314 *efg-1Δcph-1Δ* strain, that  
303 was only able to colonize 10% of the catheter (**Fig. 7G, Table S2**), 79% of it was colocalizing  
304 with Fg (**Fig. 7L**). This result further corroborates that hyphal formation is important for a robust  
305 biofilm formation during CAUTI and that Fg serves as a platform for catheter colonization *in vivo*.

306

307

## 308 **DISCUSSION**

309 In this study, we have shown that hyphal morphology and fungal interactions with Fg and  
310 fibrin are critical for establishment of CAUTI. We showed that *C. albicans* is able to survive and  
311 grow in urine and supplementation with 3% serum and Fg promotes growth. Importantly, we found  
312 that hyphal formation is induced by urine conditions *in vitro* and *C. albicans* strains exhibit  
313 pseudohyphal and hyphal morphology *in vivo* during CAUTI. The presence of Fg and fibrin  
314 enhances biofilm formation *in vitro* and *in vivo*. Thus, the catheterized bladder (consisting of urine  
315 with serum protein and high Fg and fibrin) creates the ideal environment for *C. albicans* to colonize  
316 and persist in the host.

317 Our results showed that hyphal formation was critical for Fg-dependent biofilm formation  
318 in urine conditions but not in YPD and BHI media. This seemingly contradictory result is not  
319 surprising since we have observed that laboratory growth media do not fully recapitulate  
320 conditions found within the host. For example, several factors critical for bacterial biofilm  
321 formation in CAUTI are dispensable in *in vitro* biofilm assays when using conventional laboratory  
322 growth media<sup>34,38,54-56,66</sup>. Moreover, host proteins have been shown to contribute to fungal biofilm  
323 formation<sup>49,67</sup>. A study done by the Andes group found Fg, as well as other host proteins associated  
324 with *C. albicans* biofilms in urinary catheters. retrieved from rats<sup>24</sup>. These results, taken together

325 with our previous data showing that Fg is accumulated in the bladder and deposited on the catheters  
326 <sup>1,5,13</sup>, and that Fg promotes fungal biofilm formation in urine conditions and during urinary  
327 catheterization (**Fig. 3, 5-6**), suggest that expression of Fg binding proteins could mediate fungal  
328 biofilm formation in CAUTI.

329 It has been reported that *C. albicans* encodes a Fg-binding protein, Mp58, which is  
330 expressed during candidiasis<sup>4,52</sup>. Furthermore, other cell surface adhesins such as Agglutinin-like  
331 sequence (ALS) glycoproteins, hyphal regulated gene 1 (Hyr1), and hyphal wall protein 1 (Hwp1)  
332 have shown to be important in biofilm formation<sup>68-72</sup>. From these adhesins, ALS1, ALS3, and  
333 ALS9 have been shown to bind to Fg *in vitro*<sup>72-74</sup> and structural analyses have shown binding to  
334 Fg  $\gamma$ -chain via protein-protein interaction, similar to Clf adhesins in *S. aureus*<sup>74,75</sup>. However, the  
335 role of Mp58, ALSs, Hyr1, and Hwp1 on binding to Fg and their contribution to catheter and  
336 bladder colonization during CAUTI have not been described. These adhesins will be explored in  
337 further studies.

338 Interestingly, Mp58, ALSs, Hyr1, and Hwp1 are specifically expressed during hyphal  
339 formation<sup>4,52,76-79</sup>. Transition between yeast and hyphae is central to virulence and this shift is  
340 responsive to the environment<sup>10,19,20,22,79</sup>. Our results have shown that urine conditions and the  
341 catheterized bladder environment induce hyphal formation, which suggest these adhesins and other  
342 virulence factors may be expressed during CAUTI. Importantly, we have shown that SC5314 *efg-*  
343 *1* $\Delta$ *cph-1* $\Delta$  hyphal mutant exhibited defective biofilm formation and Fg binding in urine condition.  
344 Furthermore, it displayed deficient catheter and bladder colonization during urinary  
345 catheterization. Therefore, Efg1 and Cph1 downstream targets such as Hwp1, Hwp2, Hyr1, ALS8,  
346 and secreted aspartyl proteinases (SAP)-4, -5, -6, and -9<sup>80,81</sup> may play independent roles in *C.*  
347 *albicans* CAUTI pathogenesis. Since the Efg1 and Cph1 regulatory networks are known,

348 dissection of their contributions to fungal infection in the catheterized bladder will be further  
349 explored.

350 Hyphal cells are important for the formation of biofilms and tissue invasion<sup>70,82-84</sup>. This  
351 correlates with our observation that strains were in primarily hyphal morphology on the biofilms  
352 and we observed hyphal invasion of urothelium and lamina propria during CAUTI. Importantly,  
353 massive neutrophil recruitment occurred into the areas of fungal tissue invasion; this was not  
354 observed in the SC5314 *efg-1Δcph-1Δ* hyphal mutant. Studies have shown that neutrophils  
355 respond to *C. albicans* site of entry, responding to epithelial-released cytokines and chemokines  
356 in addition to recognizing fungal factors such as SAPs<sup>85-88</sup>. Neutrophils are able to phagocytize  
357 and kill yeast cells and short hyphae while large hyphae are killed by inducing neutrophil  
358 extracellular traps (NETs), which releases DNA, granule enzymes, and antimicrobial peptides<sup>85,88-</sup>  
359 <sup>91</sup>. Furthermore, it has been shown that neutropenic patients developed candidemia from  
360 candiduria, suggesting that bladder recruited neutrophils are critical to control fungal systemic  
361 dissemination<sup>59</sup>. Our future studies will be focused on understanding the immune cell strategies  
362 against the fungal CAUTI and their role in containing the fungal infection in the bladder.

363 *C. albicans* occupies many niches in the human body, and morphological changes are  
364 associated with the establishment of diseased states. This is most important in the bladder, since it  
365 is an open and dynamic system, where urine is constantly passing through. Therefore, in order to  
366 establish a successful colonization, adhesion and biofilm formation on the urinary catheter is  
367 essential<sup>13,34,36,39,92</sup>. Our results are consistent with that, *Candida* biofilms not only ensures  
368 colonization but can protect the growing cells from the hostile environment and potentiate  
369 establishment of the infection<sup>93,94</sup>. Targeting these hyphal genes so filamentation cannot occur  
370 could be a possible therapeutic avenue for preventing *C. albicans* CAUTIs. Moreover, our results



371 highlight the importance of Fg and fibrin in the process, hence blocking deposition of these  
372 proteins onto the catheter might prevent fungal biofilm formation as well. As these fungal  
373 pathogens are becoming more commonplace in the healthcare setting, it is essential that the  
374 pathogenesis of *Candida spp.* is better understood in order to decrease the spread of infection and  
375 mortality rates. Understanding key characteristics of *C. albicans*' for CAUTI pathogenesis is the  
376 foundation to understanding and subsequently preventing *Candida spp.* infections.

377

## 378 **MATERIALS AND METHODS**

379

### 380 **Ethics statement**

381 All animal care was consistent with the Guide for the Care and Use of Laboratory Animals  
382 from the National Research Council. The University of Notre Dame Institutional Animal Care and  
383 Use Committee approved all mouse infections and procedures as part of protocol number 18-08-  
384 4792MD. For urine collections, all donors signed an informed consent form and protocols were  
385 approved by the Institutional Review Board of the University of Notre Dame under study #19-04-  
386 5273.

387

388

389 **Urine Collection.** Human urine from at least two healthy female donors between the ages of 20 -  
390 35 were collected and pooled. Donors did not have a history of kidney disease, diabetes, or recent  
391 antibiotic treatment. Urine was sterilized with a 0.22  $\mu\text{m}$  filter (VWR 29186-212) and pH was  
392 normalized to 6.0-6.5. BSA (VWR 97061-48) supplemented urine was sterilized again using a

393 0.22 µm filter. When urine was supplemented with Fg (Enzyme Research Laboratories FIB 3), it  
394 was added directly to the sterilized urine and the urine was not sterilized after the addition of Fg.

395

396 **Fungal Culture Conditions.** All strains of *Candida albicans* were cultured at 37 °C with aeration  
397 in 5 mL of YPD (10g/L Yeast Extract (VWR J850-500G), 20g/L Peptone (VWR J636-500G), 20  
398 g/L Dextrose (VWR BDH9230-500G)) broth. For *in vivo* mouse experiments, *C. albicans* strains  
399 were grown static for ~5 hrs in 5 mL of YPD followed by static overnight culture in human urine.

400

401 **Growth Curve.** Growth curves were performed in glass test tubes (Thermo Fisher Scientific 14-  
402 961-29). Overnight cultures (all in stationary phase; measured using a UV/Vis Spectrophotometer)  
403 were normalized to  $\sim 1 \times 10^7$  CFU/ml in 1xPBS (Sigma–Aldrich 1002786391). The culture was then  
404 diluted (1:1000) into human urine (supplemented with 1 mg/mL BSA, 1 mg/mL Fg, 50X amino  
405 acids, or 1 mg/mL human serum), BHI (incubated statically or shaking), or YPD (incubated  
406 statically or shaking) and were incubated in the test tube at 37°C for 48 hours. At 0, 24, and 48  
407 hours, samples of each condition were taken and analyzed by CFU counts. All serum donors signed  
408 an informed consent form and protocols were approved by the Institutional Review Board of the  
409 University of Notre Dame under study #18-08-4834.

410

411 **Morphology Assay and CellProfiler Analysis.** All strains of *C. albicans* were grown in YPD  
412 with or without serum and in human urine with or without serum. At 0, 24, and 48 hours, a sample  
413 of each condition was taken, fixed with 10% formalin, and stained with 100 µg/mL of calcofluor.  
414 Samples were viewed under a Zeiss inverted light microscope (Carl Zeiss, Thornwood, NY) with  
415 the DAPI fluorescent channel. Random images were taken at 100x magnification and processed

416 with CellProfiler. A pipeline (CellProfiler) was created to identify fungal cells and measure the  
417 form factor (circularity) of each outlined cell. Based on the form factor value (form factor of a  
418 straight line is 0 and form factor of a perfect circle is 1), each cell was assigned to a particular  
419 morphology as follows: form factors <0.25, hypha; 0.25 – 0.5, pseudohypha; >0.5, yeast. Details  
420 on the pipeline are provided as supplementary materials. Images (consisting of a 3 x 3 tiled region,  
421 i.e. 9 fields of view) were randomly acquired and at least three images were analyzed per condition.  
422 The total number of cells per phenotype were summed and divided by the total number of cells to  
423 give the overall percentage of each cell type on Microsoft Excel.

424

425

426

#### 427 **Antibodies and dyes used in this study.**

428 **Primary antibodies:** Goat anti-fibrinogen (Sigma-Aldrich F8512), rabbit anti-*Candida*  
429 (ThermoFisher Scientific PA1-27158), and rat anti-mouse Ly6G (BD Pharmingen 551459).

430 **Secondary antibodies:** Alexaflour 488-labeled donkey anti-goat (ThermoFisher Scientific SA5-  
431 10086); Alexaflour 594-labeled donkey anti-rabbit (ThermoFisher Scientific SA5-10039);  
432 Alexaflour 647-labeled donkey anti-rat (ThermoFisher Scientific SA5-10029); IRDye 800CW  
433 donkey anti-goat; and IRDye 680LT donkey anti-rabbit. Alexaflour secondary antibodies were  
434 purchased from Invitrogen Molecular Probes and IRDye conjugates secondary antibodies from LI-  
435 COR Biosciences. **Dyes:** Hoechst dye (Thermo Fisher Scientific 62249) staining; Hematoxylin  
436 and Eosin (H&E) (vector Laboratories #H-3502).

437 **Biofilm Formation in 96-well plates.** Biofilm formations were performed in 96 well flat-  
438 bottomed plates (VWR 10861-562) were coated with 100uL of BSA or Fg (150 µg/mL) incubated

439 overnight at 4°C. The various strains were grown as described above and the inoculum normalized  
440 to  $\sim 1 \times 10^6$  CFU/ml. Cultures were then diluted (1:1000) into YPD, BHI, or human urine. 100  $\mu$ L of  
441 the inoculum were incubated in the wells of the 96 well plate at 37°C for 48 hours while static.

442 Following the 48hr incubation, the supernatant was removed from the plate and washed  
443 three times with 200  $\mu$ L 1x PBS to remove unbound fungi. Plates were fixed with 10% neutralizing  
444 formalin (Leica 3800600) for 20 minutes and followed by three washes with PBS containing  
445 0.05% Tween-20 (PBS-T). Blocking solution (PBS with 1.5% BSA and 0.1% sodium azide (Acros  
446 Organics 447811000)) was added to the plate for one hour at room temperature and then washed  
447 with PBS-T (3x). Biofilms were incubated with anti-*Candida* antibodies diluted into dilution  
448 buffer (PBS with 0.05% Tween (VWR M147-1L), 0.1% BSA) for two hours. Plates were washed  
449 three times with PBS-T and incubated for one hour with IRDye 680 LT donkey anti-rabbit  
450 secondary antibody solution at room temperature and washed with PBS-T (3x). As a final step, the  
451 biofilms were visualized by scanning the plates using the Odyssey Imaging System (LI-COR  
452 Biosciences) and the analyzed with Image Studio software to obtain the fluorescence intensities  
453 (LI-COR Version 5.2, Lincoln, NE).

454

455 **BSA or Fg-coated dishes and formation of Fibrin fibers/nets.** For these assays No. 0 coverglass  
456 glass-bottom 35 mm petri dish with a 14 mm microwell (MatTek P35G-0-14-C) were used. The  
457 dishes were coated with 150  $\mu$ g/mL of BSA or Fg overnight at 4°C. For fibrin fiber/nets formation,  
458 Fg and thrombin (Sigma-Aldrich T6884-250UN) were thawed at 37°C. 100  $\mu$ l of 0.5 mg/ml Fg in  
459 PBS was added into the microwell glass-bottom and then 10  $\mu$ l of 2 U/ml thrombin was added to  
460 polymerize Fg into fibrin. Dishes were incubated at 37°C for 1 hour and kept overnight at 4°C

461

462 **Visualization of biofilms and fungal-fibrin interaction.** The various strains were grown as  
463 described above and the inoculum normalized to  $\sim 1 \times 10^7$  CFU/ml in PBS. These cultures were then  
464 diluted (1:1000) into human urine, added to the BSA-, Fg-, or fibrin coated dishes and then were  
465 incubated at 37°C for 48 hours under static conditions. After incubation, dishes were then washed  
466 three times with 1x PBS to remove unbound fungi, then dishes were fixed with 10% neutralizing  
467 formalin solution for 20 minutes and washed with 1x PBS three times. Dishes were blocked with  
468 blocking solution was added for an hour at room temperature as described above. Then BSA- and  
469 Fg-coated dishes were incubated in primary antibody (rabbit anti-*Candida*) and for fibrin-coated  
470 dishes were incubated with rabbit anti-*Candida* and goat anti-Fg antibodies. Incubation with the  
471 primary antibodies was done for two hours followed by three washes with PBS-T. Then, dishes  
472 were incubated for 1 hour with Alexaflour 594-labeled donkey anti-rabbit secondary antibody for  
473 BSA- and Fg-coated dishes and Alexaflour 594-labeled donkey anti-rabbit and Alexaflour 488-  
474 labeled donkey anti-goat antibodies for fibrin-coated dishes, followed by three washes with PBS-  
475 T. BSA- and Fg- coated dishes were visualized with a Zeiss inverted light microscope, and images  
476 were taken at different magnifications (10x, 20x, 40x and 100x). Zen Pro and Fiji-ImageJ<sup>95</sup>  
477 softwares were used to analyze the images. For the fungal-fibrin interaction, fibrin-coated dishes  
478 were visualized by Nikon A1-R/Multi-Photon Laser Scanning Confocal Microscope and images  
479 were analyzed by IMARIS Image Analysis software and ImageJ software<sup>95</sup>.

480

481 ***In Vivo* Mouse Model.** Mice used in this study were  $\sim 6$ -week-old female wild-type C57BL/6 mice  
482 purchased from Jackson Laboratory. Mice were subjected to transurethral implantation of a  
483 silicone catheter and inoculated as previously described<sup>57</sup>. Briefly, mice were anesthetized by  
484 inhalation of isoflurane and implanted with a 6-mm-long silicone catheter (BrainTree Scientific

485 SIL 025). Mice were infected immediately following catheter implantation with 50  $\mu$ l of  $\sim 1 \times 10^7$   
486 CFU/mL in PBS, of one of the fungal strains introduced into the bladder lumen by transurethral  
487 inoculation. Mice were sacrificed at 24 hours post infection by cervical dislocation after anesthesia  
488 inhalation and catheter, bladder, kidneys, spleen and heart were aseptically harvested for fungal  
489 CFU enumeration. A subset of catheters were fixed for imaging as described below and a subset  
490 of bladders were fixed and processed for immunofluorescence and histology analysis as described  
491 below.

492 **Catheter Imaging and Analysis.** Harvested catheters were fixed for imaging via standard IF  
493 procedure as previously described<sup>54</sup>. Briefly, catheters were fixed with formalin, blocked, washed  
494 with 1x PBS, and incubated with the appropriate primary antibodies overnight. Catheters were  
495 then incubated with secondary antibodies for two hours at room temperature. Catheters were  
496 washed with PBS-T and then a final wash with PBS. Catheters were visualized with the Odyssey  
497 Imaging System and then analyzed using color pixel counter from Fiji-ImageJ software<sup>95</sup>. The  
498 number of pixels of each color was compared to the total number of pixels to identify percent  
499 coverage of the catheter.

500

501 **Bladder IHC and H&E Staining of Mouse Bladders.** Mouse bladders were fixed in 10%  
502 formalin overnight, before being processed for sectioning and staining as previously described<sup>53</sup>.  
503 Briefly, bladder sections were deparaffinized, rehydrated, and rinsed with water. Antigen retrieval  
504 was accomplished by boiling the samples in Na-citrate, washing in tap water, and then incubating  
505 in 1x PBS three times. Sections were then blocked (1% BSA, 0.3% TritonX100 (Acros Organics  
506 21568-2500) in 1x PBS) washed in 1x PBS, and incubated with appropriate primary antibodies  
507 diluted in blocking buffer overnight at 4 °C. Next, sections were washed with 1x PBS, incubated

508 with secondary antibodies for 2 h at room temperature, and washed once more in 1x PBS prior to  
509 Hoechst dye staining. Secondary antibodies for immunohistochemistry were Alexa 488 donkey  
510 anti-goat, Alexa 550 donkey anti-rabbit, and Alexa 650 donkey anti-rat. Hematoxylin and Eosin  
511 (H&E) stain for light microscopy was done by the CORE facilities at the University of Notre Dame  
512 (ND CORE). All imaging was done using a Zeiss inverted light microscope. Zen Pro and ImageJ  
513 software were used to analyze the images.

514

515 **Statistical Analysis.** Data from at least 3 experiments were pooled for each assay. Two-tailed  
516 Mann-Whitney *U* tests were performed with GraphPad Prism 5 software (GraphPad Software, San  
517 Diego, CA) for all comparisons described in biofilm, CAUTI, and catheter coverage experiments.  
518 Values represent means  $\pm$  SEM derived from at least 3 independent experiments. \*,  $P < 0.05$ ; \*\*,  
519  $P < 0.005$ ; \*\*\*,  $P < 0.0005$ ; ns, difference not significant.

520

521

522

523

524

525

526

527

528

529

530

531 **REFERENCES**

- 532 1 Flores-Mireles, A., Hreha, T. N. & Hunstad, D. A. Pathophysiology, Treatment, and Prevention of  
533 Catheter-Associated Urinary Tract Infection. *Top Spinal Cord Inj Rehabil* **25**, 228-240,  
534 doi:10.1310/sci2503-228 (2019).
- 535 2 Fisher, J. F., Kavanagh, K., Sobel, J. D., Kauffman, C. A. & Newman, C. A. Candida urinary tract  
536 infection: pathogenesis. *Clin Infect Dis* **52 Suppl 6**, S437-451, doi:10.1093/cid/cir110 (2011).
- 537 3 R, Y., M, P. S., U, A. B., R, R. & K, B. A. Candiduria: prevalence and trends in antifungal  
538 susceptibility in a tertiary care hospital of mangalore. *J Clin Diagn Res* **7**, 2459-2461,  
539 doi:10.7860/jcdr/2013/6298.3578 (2013).
- 540 4 Casanova, M. *et al.* Identification of a 58-kilodalton cell surface fibrinogen-binding  
541 mannoprotein from *Candida albicans*. *Infect Immun* **60**, 4221-4229 (1992).
- 542 5 Flores-Mireles, A. L. *et al.* Fibrinogen Release and Deposition on Urinary Catheters Placed during  
543 Urological Procedures. *J Urol* **196**, 416-421, doi:10.1016/j.juro.2016.01.100 (2016).
- 544 6 Pfaller, M. A. & Diekema, D. J. Epidemiology of invasive candidiasis: a persistent public health  
545 problem. *Clin Microbiol Rev* **20**, 133-163, doi:10.1128/cmr.00029-06 (2007).
- 546 7 Rodrigues, M. L. & Nosanchuk, J. D. Fungal diseases as neglected pathogens: A wake-up call to  
547 public health officials. *PLoS Negl Trop Dis* **14**, e0007964, doi:10.1371/journal.pntd.0007964  
548 (2020).
- 549 8 Sanguinetti, M., Posteraro, B. & Lass-Flörl, C. Antifungal drug resistance among *Candida* species:  
550 mechanisms and clinical impact. *Mycoses* **58 Suppl 2**, 2-13, doi:10.1111/myc.12330 (2015).
- 551 9 Antibiotic resistance threats in the United States, 2019. (2019).
- 552 10 Nobile, C. J. & Johnson, A. D. *Candida albicans* Biofilms and Human Disease. *Annu Rev Microbiol*  
553 **69**, 71-92, doi:10.1146/annurev-micro-091014-104330 (2015).
- 554 11 Tsui, C., Kong, E. F. & Jabra-Rizk, M. A. Pathogenesis of *Candida albicans* biofilm. *Pathog Dis* **74**,  
555 ftw018, doi:10.1093/femspd/ftw018 (2016).
- 556 12 Duggan, S., Leonhardt, I., Hunniger, K. & Kurzai, O. Host response to *Candida albicans*  
557 bloodstream infection and sepsis. *Virulence* **6**, 316-326, doi:10.4161/21505594.2014.988096  
558 (2015).
- 559 13 Flores-Mireles, A. L., Walker, J. N., Caparon, M. & Hultgren, S. J. Urinary tract infections:  
560 epidemiology, mechanisms of infection and treatment options. *Nat Rev Microbiol* **13**, 269-284,  
561 doi:10.1038/nrmicro3432 (2015).
- 562 14 Maki, D. G. & Tambyah, P. A. Engineering out the risk for infection with urinary catheters. *Emerg*  
563 *Infect Dis* **7**, 342-347, doi:10.3201/eid0702.010240 (2001).
- 564 15 Rogers, M. A. *et al.* Use of urinary collection devices in skilled nursing facilities in five states. *J*  
565 *Am Geriatr Soc* **56**, 854-861, doi:10.1111/j.1532-5415.2008.01675.x (2008).
- 566 16 Montoya, A. & Mody, L. Common infections in nursing homes: a review of current issues and  
567 challenges. *Aging health* **7**, 889-899, doi:10.2217/ahe.11.80 (2011).
- 568 17 Cleary, I. A. *et al.* Examination of the pathogenic potential of *Candida albicans* filamentous cells  
569 in an animal model of haematogenously disseminated candidiasis. *FEMS Yeast Res* **16**, fow011,  
570 doi:10.1093/femsyr/fow011 (2016).
- 571 18 Mayer, F. L., Wilson, D. & Hube, B. *Candida albicans* pathogenicity mechanisms. *Virulence* **4**,  
572 119-128, doi:10.4161/viru.22913 (2013).
- 573 19 Thompson, D. S., Carlisle, P. L. & Kadosh, D. Coevolution of morphology and virulence in *Candida*  
574 species. *Eukaryot Cell* **10**, 1173-1182, doi:10.1128/EC.05085-11 (2011).
- 575 20 Sudbery, P. E. Growth of *Candida albicans* hyphae. *Nat Rev Microbiol* **9**, 737-748,  
576 doi:10.1038/nrmicro2636 (2011).



- 577 21 Noble, S. M., Gianetti, B. A. & Witchley, J. N. Candida albicans cell-type switching and functional  
578 plasticity in the mammalian host. *Nat Rev Microbiol* **15**, 96-108, doi:10.1038/nrmicro.2016.157  
579 (2017).
- 580 22 Pukkila-Worley, R., Peleg, A. Y., Tampakakis, E. & Mylonakis, E. Candida albicans Hyphal  
581 Formation and Virulence Assessed Using a Caenorhabditis elegans Infection Model. *Eukaryotic*  
582 *Cell* **8**, 1750-1758, doi:10.1128/Ec.00163-09 (2009).
- 583 23 Maddirala, A. R. *et al.* Biphenyl Gal and GalNAc FmlH Lectin Antagonists of Uropathogenic E. coli  
584 (UPEC): Optimization through Iterative Rational Drug Design. *J Med Chem* **62**, 467-479,  
585 doi:10.1021/acs.jmedchem.8b01561 (2019).
- 586 24 Nett, J. E. & Andes, D. R. Contributions of the Biofilm Matrix to Candida Pathogenesis. *J Fungi*  
587 (*Basel*) **6**, doi:10.3390/jof6010021 (2020).
- 588 25 Wall, G., Montelongo-Jauregui, D., Vidal Bonifacio, B., Lopez-Ribot, J. L. & Uppuluri, P. Candida  
589 albicans biofilm growth and dispersal: contributions to pathogenesis. *Curr Opin Microbiol* **52**, 1-  
590 6, doi:10.1016/j.mib.2019.04.001 (2019).
- 591 26 Coste, A. T. *et al.* Emerging echinocandin-resistant Candida albicans and glabrata in Switzerland.  
592 *Infection* **48**, 761-766, doi:10.1007/s15010-020-01475-8 (2020).
- 593 27 Pristov, K. E. & Ghannoum, M. A. Resistance of Candida to azoles and echinocandins worldwide.  
594 *Clinical Microbiology and Infection* **25**, 792-798, doi:<https://doi.org/10.1016/j.cmi.2019.03.028>  
595 (2019).
- 596 28 Fisher, J. F., Sobel, J. D., Kauffman, C. A. & Newman, C. A. Candida urinary tract infections--  
597 treatment. *Clin Infect Dis* **52 Suppl 6**, S457-466, doi:10.1093/cid/cir112 (2011).
- 598 29 O'Brien, V. P., Hannan, T. J., Nielsen, H. V. & Hultgren, S. J. Drug and Vaccine Development for  
599 the Treatment and Prevention of Urinary Tract Infections. *Microbiology spectrum* **4**,  
600 doi:10.1128/microbiolspec.UTI-0013-2012 (2016).
- 601 30 Garibaldi, R. A., Burke, J. P., Dickman, M. L. & Smith, C. B. Factors predisposing to bacteriuria  
602 during indwelling urethral catheterization. *The New England journal of medicine* **291**, 215-219,  
603 doi:10.1056/NEJM197408012910501 (1974).
- 604 31 Norden, C. W., Green, G. M. & Kass, E. H. Antibacterial mechanisms of the urinary bladder. *The*  
605 *Journal of clinical investigation* **47**, 2689-2700, doi:10.1172/JCI105952 (1968).
- 606 32 Warren, J. W. Catheter-associated urinary tract infections. *Infectious disease clinics of North*  
607 *America* **11**, 609-622 (1997).
- 608 33 Parsons, C. L. Pathogenesis of urinary tract infections. Bacterial adherence, bladder defense  
609 mechanisms. *The Urologic clinics of North America* **13**, 563-568 (1986).
- 610 34 Flores-Mireles, A. L., Pinkner, J. S., Caparon, M. G. & Hultgren, S. J. EbpA vaccine antibodies  
611 block binding of Enterococcus faecalis to fibrinogen to prevent catheter-associated bladder  
612 infection in mice. *Sci Transl Med* **6**, 254ra127, doi:10.1126/scitranslmed.3009384 (2014).
- 613 35 Flores-Mireles, A. L. *et al.* Antibody-Based Therapy for Enterococcal Catheter-Associated Urinary  
614 Tract Infections. *Mbio* **7**, doi:10.1128/mBio.01653-16 (2016).
- 615 36 Flores-Mireles, A. L. *et al.* Antibody-Based Therapy for Enterococcal Catheter-Associated Urinary  
616 Tract Infections. *Mbio* **7**, doi:ARTN e01653-1610.1128/mBio.01653-16 (2016).
- 617 37 Guiton, P. S., Hannan, T. J., Ford, B., Caparon, M. G. & Hultgren, S. J. Enterococcus faecalis  
618 overcomes foreign body-mediated inflammation to establish urinary tract infections. *Infect*  
619 *Immun* **81**, 329-339, doi:10.1128/IAI.00856-12 (2013).
- 620 38 Guiton, P. S., Hung, C. S., Hancock, L. E., Caparon, M. G. & Hultgren, S. J. Enterococcal biofilm  
621 formation and virulence in an optimized murine model of foreign body-associated urinary tract  
622 infections. *Infect Immun* **78**, 4166-4175, doi:10.1128/IAI.00711-10 (2010).

- 623 39 Walker, J. N. *et al.* Catheterization alters bladder ecology to potentiate *Staphylococcus aureus*  
624 infection of the urinary tract. *Proc Natl Acad Sci U S A* **114**, E8721-E8730,  
625 doi:10.1073/pnas.1707572114 (2017).
- 626 40 Di Venanzio, G. *et al.* Urinary tract colonization is enhanced by a plasmid that regulates  
627 uropathogenic *Acinetobacter baumannii* chromosomal genes. *Nat Commun* **10**, doi:ARTN  
628 276310.1038/s41467-019-10706-y (2019).
- 629 41 Gaston, J. R. *et al.* Enterococcus faecalis Polymicrobial Interactions Facilitate Biofilm Formation,  
630 Antibiotic Recalcitrance, and Persistent Colonization of the Catheterized Urinary Tract.  
631 *Pathogens* **9**, doi:ARTN 83510.3390/pathogens9100835 (2020).
- 632 42 Alves, R. *et al.* Adapting to survive: How *Candida* overcomes host-imposed constraints during  
633 human colonization. *Plos Pathog* **16**, doi:ARTN e100847810.1371/journal.ppat.1008478 (2020).
- 634 43 Walker, J. N. *et al.* High-resolution imaging reveals microbial biofilms on patient urinary  
635 catheters despite antibiotic administration. *World J Urol* **38**, 2237-2245, doi:10.1007/s00345-  
636 019-03027-8 (2020).
- 637 44 Bar-Yosef, H., Vivanco Gonzalez, N., Ben-Aroya, S., Kron, S. J. & Kornitzer, D. Chemical inhibitors  
638 of *Candida albicans* hyphal morphogenesis target endocytosis. *Sci Rep* **7**, 5692,  
639 doi:10.1038/s41598-017-05741-y (2017).
- 640 45 Watanabe, H., Azuma, M., Igarashi, K. & Ooshima, H. Relationship between cell morphology and  
641 intracellular potassium concentration in *Candida albicans*. *J Antibiot* **59**, 281-287, doi:DOI  
642 10.1038/ja.2006.39 (2006).
- 643 46 Feng, Q. H., Summers, E., Guo, B. & Fink, G. Ras signaling is required for serum-induced hyphal  
644 differentiation in *Candida albicans*. *Journal of Bacteriology* **181**, 6339-6346, doi:Doi  
645 10.1128/Jb.181.20.6339-6346.1999 (1999).
- 646 47 Kamentsky, L. *et al.* Improved structure, function and compatibility for CellProfiler: modular  
647 high-throughput image analysis software. *Bioinformatics* **27**, 1179-1180,  
648 doi:10.1093/bioinformatics/btr095 (2011).
- 649 48 Nett, J. E. *et al.* Rat indwelling urinary catheter model of *Candida albicans* biofilm infection.  
650 *Infect Immun* **82**, 4931-4940, doi:10.1128/IAI.02284-14 (2014).
- 651 49 Nett, J. E. *et al.* Host contributions to construction of three device-associated *Candida albicans*  
652 biofilms. *Infect Immun* **83**, 4630-4638, doi:10.1128/IAI.00931-15 (2015).
- 653 50 Schaller, M., Borelli, C., Korting, H. C. & Hube, B. Hydrolytic enzymes as virulence factors of  
654 *Candida albicans*. *Mycoses* **48**, 365-377, doi:10.1111/j.1439-0507.2005.01165.x (2005).
- 655 51 Carlisle, P. L. *et al.* Expression levels of a filament-specific transcriptional regulator are sufficient  
656 to determine *Candida albicans* morphology and virulence. *P Natl Acad Sci USA* **106**, 599-604,  
657 doi:10.1073/pnas.0804061106 (2009).
- 658 52 Sepulveda, P. *et al.* *Candida albicans* fibrinogen binding mannoprotein: expression in clinical  
659 strains and immunogenicity in patients with candidiasis. *International microbiology : the official*  
660 *journal of the Spanish Society for Microbiology* **1**, 209-216 (1998).
- 661 53 Walker, J. N. *et al.* Catheterization alters bladder ecology to potentiate *Staphylococcus aureus*  
662 infection of the urinary tract. *P Natl Acad Sci USA* **114**, E8721-E8730,  
663 doi:10.1073/pnas.1707572114 (2017).
- 664 54 Colomer-Winter, C., Lemos, J. A. & Flores-Mireles, A. L. Biofilm Assays on Fibrinogen-coated  
665 Silicone Catheters and 96-well Polystyrene Plates. *Bio Protoc* **9**, doi:10.21769/BioProtoc.3196  
666 (2019).
- 667 55 Colomer-Winter, C. *et al.* Manganese acquisition is essential for virulence of *Enterococcus*  
668 *faecalis*. *Plos Pathog* **14**, e1007102, doi:10.1371/journal.ppat.1007102 (2018).

- 669 56 Colomer-Winter, C., Flores-Mireles, A. L., Kundra, S., Hultgren, S. J. & Lemos, J. A. (p)ppGpp and  
670 CodY Promote Enterococcus faecalis Virulence in a Murine Model of Catheter-Associated  
671 Urinary Tract Infection. *mSphere* **4**, doi:10.1128/mSphere.00392-19 (2019).
- 672 57 Conover, M. S., Flores-Mireles, A. L., Hibbing, M. E., Dodson, K. & Hultgren, S. J. Establishment  
673 and Characterization of UTI and CAUTI in a Mouse Model. *J Vis Exp*, e52892, doi:10.3791/52892  
674 (2015).
- 675 58 Peman, J. & Ruiz-Gaitan, A. Candidemia from urinary tract source: the challenge of candiduria.  
676 *Hosp Pract (1995)* **46**, 243-245, doi:10.1080/21548331.2018.1538623 (2018).
- 677 59 Pappas, P. G. *et al.* Clinical Practice Guideline for the Management of Candidiasis: 2016 Update  
678 by the Infectious Diseases Society of America. *Clin Infect Dis* **62**, e1-50, doi:10.1093/cid/civ933  
679 (2016).
- 680 60 Huang, P. Y. *et al.* Molecular concordance of concurrent *Candida albicans* candidemia and  
681 candiduria. *Diagn Micr Infec Dis* **76**, 382-384, doi:10.1016/j.diagmicrobio.2013.03.015 (2013).
- 682 61 Kauffman, C. A. *et al.* Prospective multicenter surveillance study of funguria in hospitalized  
683 patients. *Clinical Infectious Diseases* **30**, 14-18, doi:10.1086/313583 (2000).
- 684 62 Rousseau, M. *et al.* Bladder catheterization increases susceptibility to infection that can be  
685 prevented by prophylactic antibiotic treatment. *Jci Insight* **1**, doi:ARTN  
686 e8817810.1172/jci.insight.88178 (2016).
- 687 63 Conway, L. J., Carter, E. J. & Larson, E. L. Risk Factors for Nosocomial Bacteremia Secondary to  
688 Urinary Catheter-Associated Bacteriuria: A Systematic Review. *Urol Nurs* **35**, 191-203 (2015).
- 689 64 Greene, M. T. *et al.* Predictors of hospital-acquired urinary tract-related bloodstream infection.  
690 *Infect Control Hosp Epidemiol* **33**, 1001-1007, doi:10.1086/667731 (2012).
- 691 65 Nicolle, L. E. Catheter associated urinary tract infections. *Antimicrob Resist Infect Control* **3**, 23,  
692 doi:10.1186/2047-2994-3-23 (2014).
- 693 66 Guiton, P. S. *et al.* Contribution of autolysin and Sortase a during *Enterococcus faecalis* DNA-  
694 dependent biofilm development. *Infect Immun* **77**, 3626-3638, doi:10.1128/IAI.00219-09 (2009).
- 695 67 Zarnowski, R. *et al.* Novel entries in a fungal biofilm matrix encyclopedia. *Mbio* **5**, e01333-01314,  
696 doi:10.1128/mBio.01333-14 (2014).
- 697 68 Dwivedi, P. *et al.* Role of Bcr1-activated genes Hwp1 and Hyr1 in *Candida albicans* oral mucosal  
698 biofilms and neutrophil evasion. *PLoS One* **6**, e16218, doi:10.1371/journal.pone.0016218 (2011).
- 699 69 Nobile, C. J., Nett, J. E., Andes, D. R. & Mitchell, A. P. Function of *Candida albicans* adhesin Hwp1  
700 in biofilm formation. *Eukaryot Cell* **5**, 1604-1610, doi:10.1128/EC.00194-06 (2006).
- 701 70 Nobile, C. J. *et al.* Critical role of Bcr1-dependent adhesins in *C. albicans* biofilm formation in  
702 vitro and in vivo. *Plos Pathog* **2**, e63, doi:10.1371/journal.ppat.0020063 (2006).
- 703 71 Oh, S. H. *et al.* Agglutinin-Like Sequence (ALS) Genes in the *Candida parapsilosis* Species  
704 Complex: Blurring the Boundaries Between Gene Families That Encode Cell-Wall Proteins.  
705 *Frontiers in Microbiology* **10**, doi:ARTN 78110.3389/fmicb.2019.00781 (2019).
- 706 72 Hoyer, L. L. & Cota, E. *Candida albicans* Agglutinin-Like Sequence (Als) Family Vignettes: A  
707 Review of Als Protein Structure and Function. *Front Microbiol* **7**, 280,  
708 doi:10.3389/fmicb.2016.00280 (2016).
- 709 73 Hoyer, L. L., Green, C. B., Oh, S. H. & Zhao, X. Discovering the secrets of the *Candida albicans*  
710 agglutinin-like sequence (ALS) gene family--a sticky pursuit. *Med Mycol* **46**, 1-15,  
711 doi:10.1080/13693780701435317 (2008).
- 712 74 Salgado, P. S. *et al.* Structural basis for the broad specificity to host-cell ligands by the  
713 pathogenic fungus *Candida albicans*. *Proc Natl Acad Sci U S A* **108**, 15775-15779,  
714 doi:10.1073/pnas.1103496108 (2011).
- 715 75 Lin, J. *et al.* The peptide-binding cavity is essential for Als3-mediated adhesion of *Candida*  
716 *albicans* to human cells. *J Biol Chem* **289**, 18401-18412, doi:10.1074/jbc.M114.547877 (2014).

- 717 76 Nantel, A. *et al.* Transcription profiling of *Candida albicans* cells undergoing the yeast-to-hyphal  
718 transition. *Mol Biol Cell* **13**, 3452-3465, doi:10.1091/mbc.e02-05-0272 (2002).
- 719 77 Kadosh, D. & Johnson, A. D. Induction of the *Candida albicans* filamentous growth program by  
720 relief of transcriptional repression: a genome-wide analysis. *Mol Biol Cell* **16**, 2903-2912,  
721 doi:10.1091/mbc.e05-01-0073 (2005).
- 722 78 Carlisle, P. L. & Kadosh, D. A genome-wide transcriptional analysis of morphology determination  
723 in *Candida albicans*. *Mol Biol Cell* **24**, 246-260, doi:10.1091/mbc.E12-01-0065 (2013).
- 724 79 Witchley, J. N. *et al.* *Candida albicans* Morphogenesis Programs Control the Balance between  
725 Gut Commensalism and Invasive Infection. *Cell Host Microbe* **25**, 432-443 e436,  
726 doi:10.1016/j.chom.2019.02.008 (2019).
- 727 80 Felk, A. *et al.* *Candida albicans* hyphal formation and the expression of the Efg1-regulated  
728 proteinases Sap4 to Sap6 are required for the invasion of parenchymal organs. *Infect Immun* **70**,  
729 3689-3700, doi:10.1128/iai.70.7.3689-3700.2002 (2002).
- 730 81 Leng, P., Lee, P. R., Wu, H. & Brown, A. J. Efg1, a morphogenetic regulator in *Candida albicans*, is  
731 a sequence-specific DNA binding protein. *J Bacteriol* **183**, 4090-4093,  
732 doi:10.1128/JB.183.13.4090-4093.2001 (2001).
- 733 82 Chandra, J. *et al.* Biofilm formation by the fungal pathogen *Candida albicans*: development,  
734 architecture, and drug resistance. *J Bacteriol* **183**, 5385-5394, doi:10.1128/jb.183.18.5385-  
735 5394.2001 (2001).
- 736 83 Nobile, C. J. & Mitchell, A. P. Regulation of cell-surface genes and biofilm formation by the *C.*  
737 *albicans* transcription factor Bcr1p. *Curr Biol* **15**, 1150-1155, doi:10.1016/j.cub.2005.05.047  
738 (2005).
- 739 84 Heilmann, C. J. *et al.* Hyphal induction in the human fungal pathogen *Candida albicans* reveals a  
740 characteristic wall protein profile. *Microbiology (Reading)* **157**, 2297-2307,  
741 doi:10.1099/mic.0.049395-0 (2011).
- 742 85 Rubin-Bejerano, I., Fraser, I., Grisafi, P. & Fink, G. R. Phagocytosis by neutrophils induces an  
743 amino acid deprivation response in *Saccharomyces cerevisiae* and *Candida albicans*. *Proc Natl*  
744 *Acad Sci U S A* **100**, 11007-11012, doi:10.1073/pnas.1834481100 (2003).
- 745 86 Gabrielli, E. *et al.* In vivo induction of neutrophil chemotaxis by secretory aspartyl proteinases of  
746 *Candida albicans*. *Virulence* **7**, 819-825, doi:10.1080/21505594.2016.1184385 (2016).
- 747 87 Weindl, G. *et al.* Human epithelial cells establish direct antifungal defense through TLR4-  
748 mediated signaling. *The Journal of clinical investigation* **117**, 3664-3672, doi:10.1172/JCI28115  
749 (2007).
- 750 88 Naglik, J. R., Konig, A., Hube, B. & Gaffen, S. L. *Candida albicans*-epithelial interactions and  
751 induction of mucosal innate immunity. *Curr Opin Microbiol* **40**, 104-112,  
752 doi:10.1016/j.mib.2017.10.030 (2017).
- 753 89 Urban, C. F., Reichard, U., Brinkmann, V. & Zychlinsky, A. Neutrophil extracellular traps capture  
754 and kill *Candida albicans* yeast and hyphal forms. *Cell Microbiol* **8**, 668-676, doi:10.1111/j.1462-  
755 5822.2005.00659.x (2006).
- 756 90 Urban, C. F. *et al.* Neutrophil extracellular traps contain calprotectin, a cytosolic protein complex  
757 involved in host defense against *Candida albicans*. *Plos Pathog* **5**, e1000639,  
758 doi:10.1371/journal.ppat.1000639 (2009).
- 759 91 Kenno, S., Perito, S., Mosci, P., Vecchiarelli, A. & Monari, C. Autophagy and Reactive Oxygen  
760 Species Are Involved in Neutrophil Extracellular Traps Release Induced by *C. albicans*  
761 Morphotypes. *Front Microbiol* **7**, 879, doi:10.3389/fmicb.2016.00879 (2016).
- 762 92 Nielsen, H. V. *et al.* Pilin and sortase residues critical for endocarditis- and biofilm-associated  
763 pilus biogenesis in *Enterococcus faecalis*. *J Bacteriol* **195**, 4484-4495, doi:10.1128/JB.00451-13  
764 (2013).

- 765 93 Cavalheiro, M. & Teixeira, M. C. Candida Biofilms: Threats, Challenges, and Promising Strategies.  
766 *Front Med (Lausanne)* **5**, 28, doi:10.3389/fmed.2018.00028 (2018).  
767 94 Flemming, H. C. *et al.* Biofilms: an emergent form of bacterial life. *Nat Rev Microbiol* **14**, 563-  
768 575, doi:10.1038/nrmicro.2016.94 (2016).  
769 95 Schindelin, J. *et al.* Fiji: an open-source platform for biological-image analysis. *Nat Methods* **9**,  
770 676-682, doi:10.1038/nmeth.2019 (2012).

771  
772  
773  
774  
775  
776  
777  
778  
779

780 **Acknowledgments** We thank members of the A.L.F.M. and F.H.S.T. laboratories for their helpful  
781 suggestions and insightful comments. Especial thank you to Dr. Michael G. Caparon for his  
782 comments. **Funding:** This work was supported by institutional funds from the University of Notre  
783 Dame (to A.L.F.M. and F.H.S.T). **Author contributions** A.L.F.M., and F.H.S.T designed the  
784 experiments. A.L.L., M.J.A., A.M., P.S. performed the studies. A.L.L., A.L.F.M, and F.H.S.T.  
785 wrote the paper. **Competing interests:** The authors declare no competing financial interests.

786



787 **Figures:**

788

789

790

791 **Figure 1. *C. albicans* grows and survives in urine.** Growth curves of *C. albicans* Pt. 62 (A), Pt.  
792 65 (B), PNCL1 (C), DAY230 (D), SC5314 (E), and SC5314 *efg-1Δcph-1Δ* (F), grown in YPD,  
793 BHI, human urine conditions alone, or urine conditions supplemented with 3% human serum  
794 (serum), fibrinogen (Fg), bovine serum albumin (BSA), or amino acids (AA). Fungal growth was  
795 determined by CFUs enumeration after 0, 24, and 48 hours. Except when indicated, all strains were  
796 grown under static conditions. Data presented shows the mean and standard error derived from  
797 three independent experiments with five technical replicates.

798

799 **Figure 2. Urine conditions prompt hyphal *C. albicans* to take on a morphology.** The  
800 morphology of *C. albicans* strains were evaluated after 0, 24, and 48 hours of growth in urine and  
801 YPD with or without 3% human serum. Imaging of a population of ~300 cells/per field of view  
802 (at least 3 random field of views for each strain) were analyzed using CellProfiler to identify yeast  
803 cells and classify them based on the circularity (see Materials and Methods) of each cell as follows:  
804 hyphal (<0.25), pseudohyphal (0.25 – 0.5), or yeast (>0.5) (G).

805

806

807 **Figure 3. Fibrinogen enhances *C. albicans*' biofilm formation.** (A-F) Immunostaining analysis  
808 of biofilm formation on BSA- or Fg- coated microplates by *C. albicans* strains when grown in  
809 YPD, BHI, or human urine. At 48 hrs, *C. albicans*' biofilm was measured by fluorescence intensity  
810 by using anti-*Candida* antibodies. Data presented shows the mean and standard error derived from  
811 three independent experiments with 24 technical replicates. Differences between groups were  
812 tested for significance using the Mann-Whitney U test. \*\*\*\*, P<0.0001; ns, not statistically

813 different. (G-L) Microscopically visualization of 48 hrs *C. albicans*' biofilms biomass on BSA- or  
814 Fg-coated glass bottom petri dishes grown in urine using anti-*Candida* antibodies.

815  
816  
817

818 **Figure 4. *C. albicans*-interaction with fibrin fibers/nets in urine conditions. (A-F)**  
819 Microscopically visualization and 3D reconstruction of 48 hrs *C. albicans*' biofilms on fibrin  
820 fibers/nets grown in human urine using antibodies against Fg (anti-Fg; green) and *C. albicans*  
821 (anti-*Candida*; red). Scale bars: 100  $\mu\text{m}$  for 10x and 500  $\mu\text{m}$  for 40x. White squares represent the  
822 zoom-in area used for the higher magnification (x).

823

824 **Figure 5. *In vivo* infection shows hyphal formation is required for CAUTI.** Mice were  
825 implanted with catheters and infected with  $1 \times 10^6$  CFU of one of the six *C. albicans* strains. After  
826 24 hours, the organs (bladder, kidneys, spleen, and heart) and catheter were recovered and  
827 subjected to analysis by CFUs. (A-D) Mice experienced a high fungal burden on the harvested  
828 organs and catheter. (E) Mice infected with SC5314 *efg-1* $\Delta$ *cph-1* $\Delta$  showed significantly less  
829 colonization of the bladder, catheter, and kidneys as opposed to the SC5314 WT strain. Values  
830 represent means  $\pm$  SEM. The Mann-Whitney U test was used; \*,  $P < 0.05$  was considered  
831 statistically significant. \*\*,  $P < 0.005$ ; ns, values were not statistically significantly different. The  
832 horizontal bar represents the median value. The horizontal broken line represents the limit of  
833 detection of viable bacteria. LOD; limit of detection.

834

835 **Figure 6. Hyphal *C. albicans* cells invade the lumen of the catheterized bladder.** Mice were  
836 implanted and infected with  $1 \times 10^6$  CFU with the corresponding strain and at 24 hpi, bladders  
837 tissues and catheters were recovered. Bladder were subjected to analysis by H&E and IF staining.  
838 For the IF analysis antibody staining was used to detect Fg (anti-Fg; green), *C. albicans* (anti-

839 *Candida*; red), and neutrophils (anti-Ly6G; white). Antibody staining with DAPI (blue) delineated  
840 the urothelium and cell nuclei (representative images). The white broken line separates the bladder  
841 lumen (L) from the urothelium surface (U), the lamina propria (LP), and muscularis (M). H&E  
842 stained bladder scale bars, 700  $\mu\text{m}$ . White squares represent a zoom in done for the next  
843 magnification (x). Blue arrow heads indicate *C. albicans* colonization.

844  
845  
846

847 **Figure 7. Colocalization of *C. albicans* strains with deposited fibrinogen on catheters during**  
848 **CAUTI.** Catheterized mice were challenged with  $1 \times 10^6$  CFU of the indicated *C. albicans* strain.  
849 Then implanted catheters were retrieved 24hpi stained with antibodies to detect Fg (anti-Fg; green)  
850 and *C. albicans* (anti-*Candida*; red) (**B-G**). Quantification of fungal colocalization with deposited  
851 Fg on the catheter (**H-L**). The Mann-Whitney U test was used to analyze catheter colonization  
852 between SC5314 WT and hyphal mutant; \*,  $P < 0.05$ ; Values represent the means  $\pm$  standard  
853 deviation derived from co-localization of the catheter segments. Non-implanted catheters were  
854 used a negative control (**A**).

855  
856  
857  
858  
859  
860  
861  
862  
863  
864  
865  
866  
867  
868  
869  
870  
871



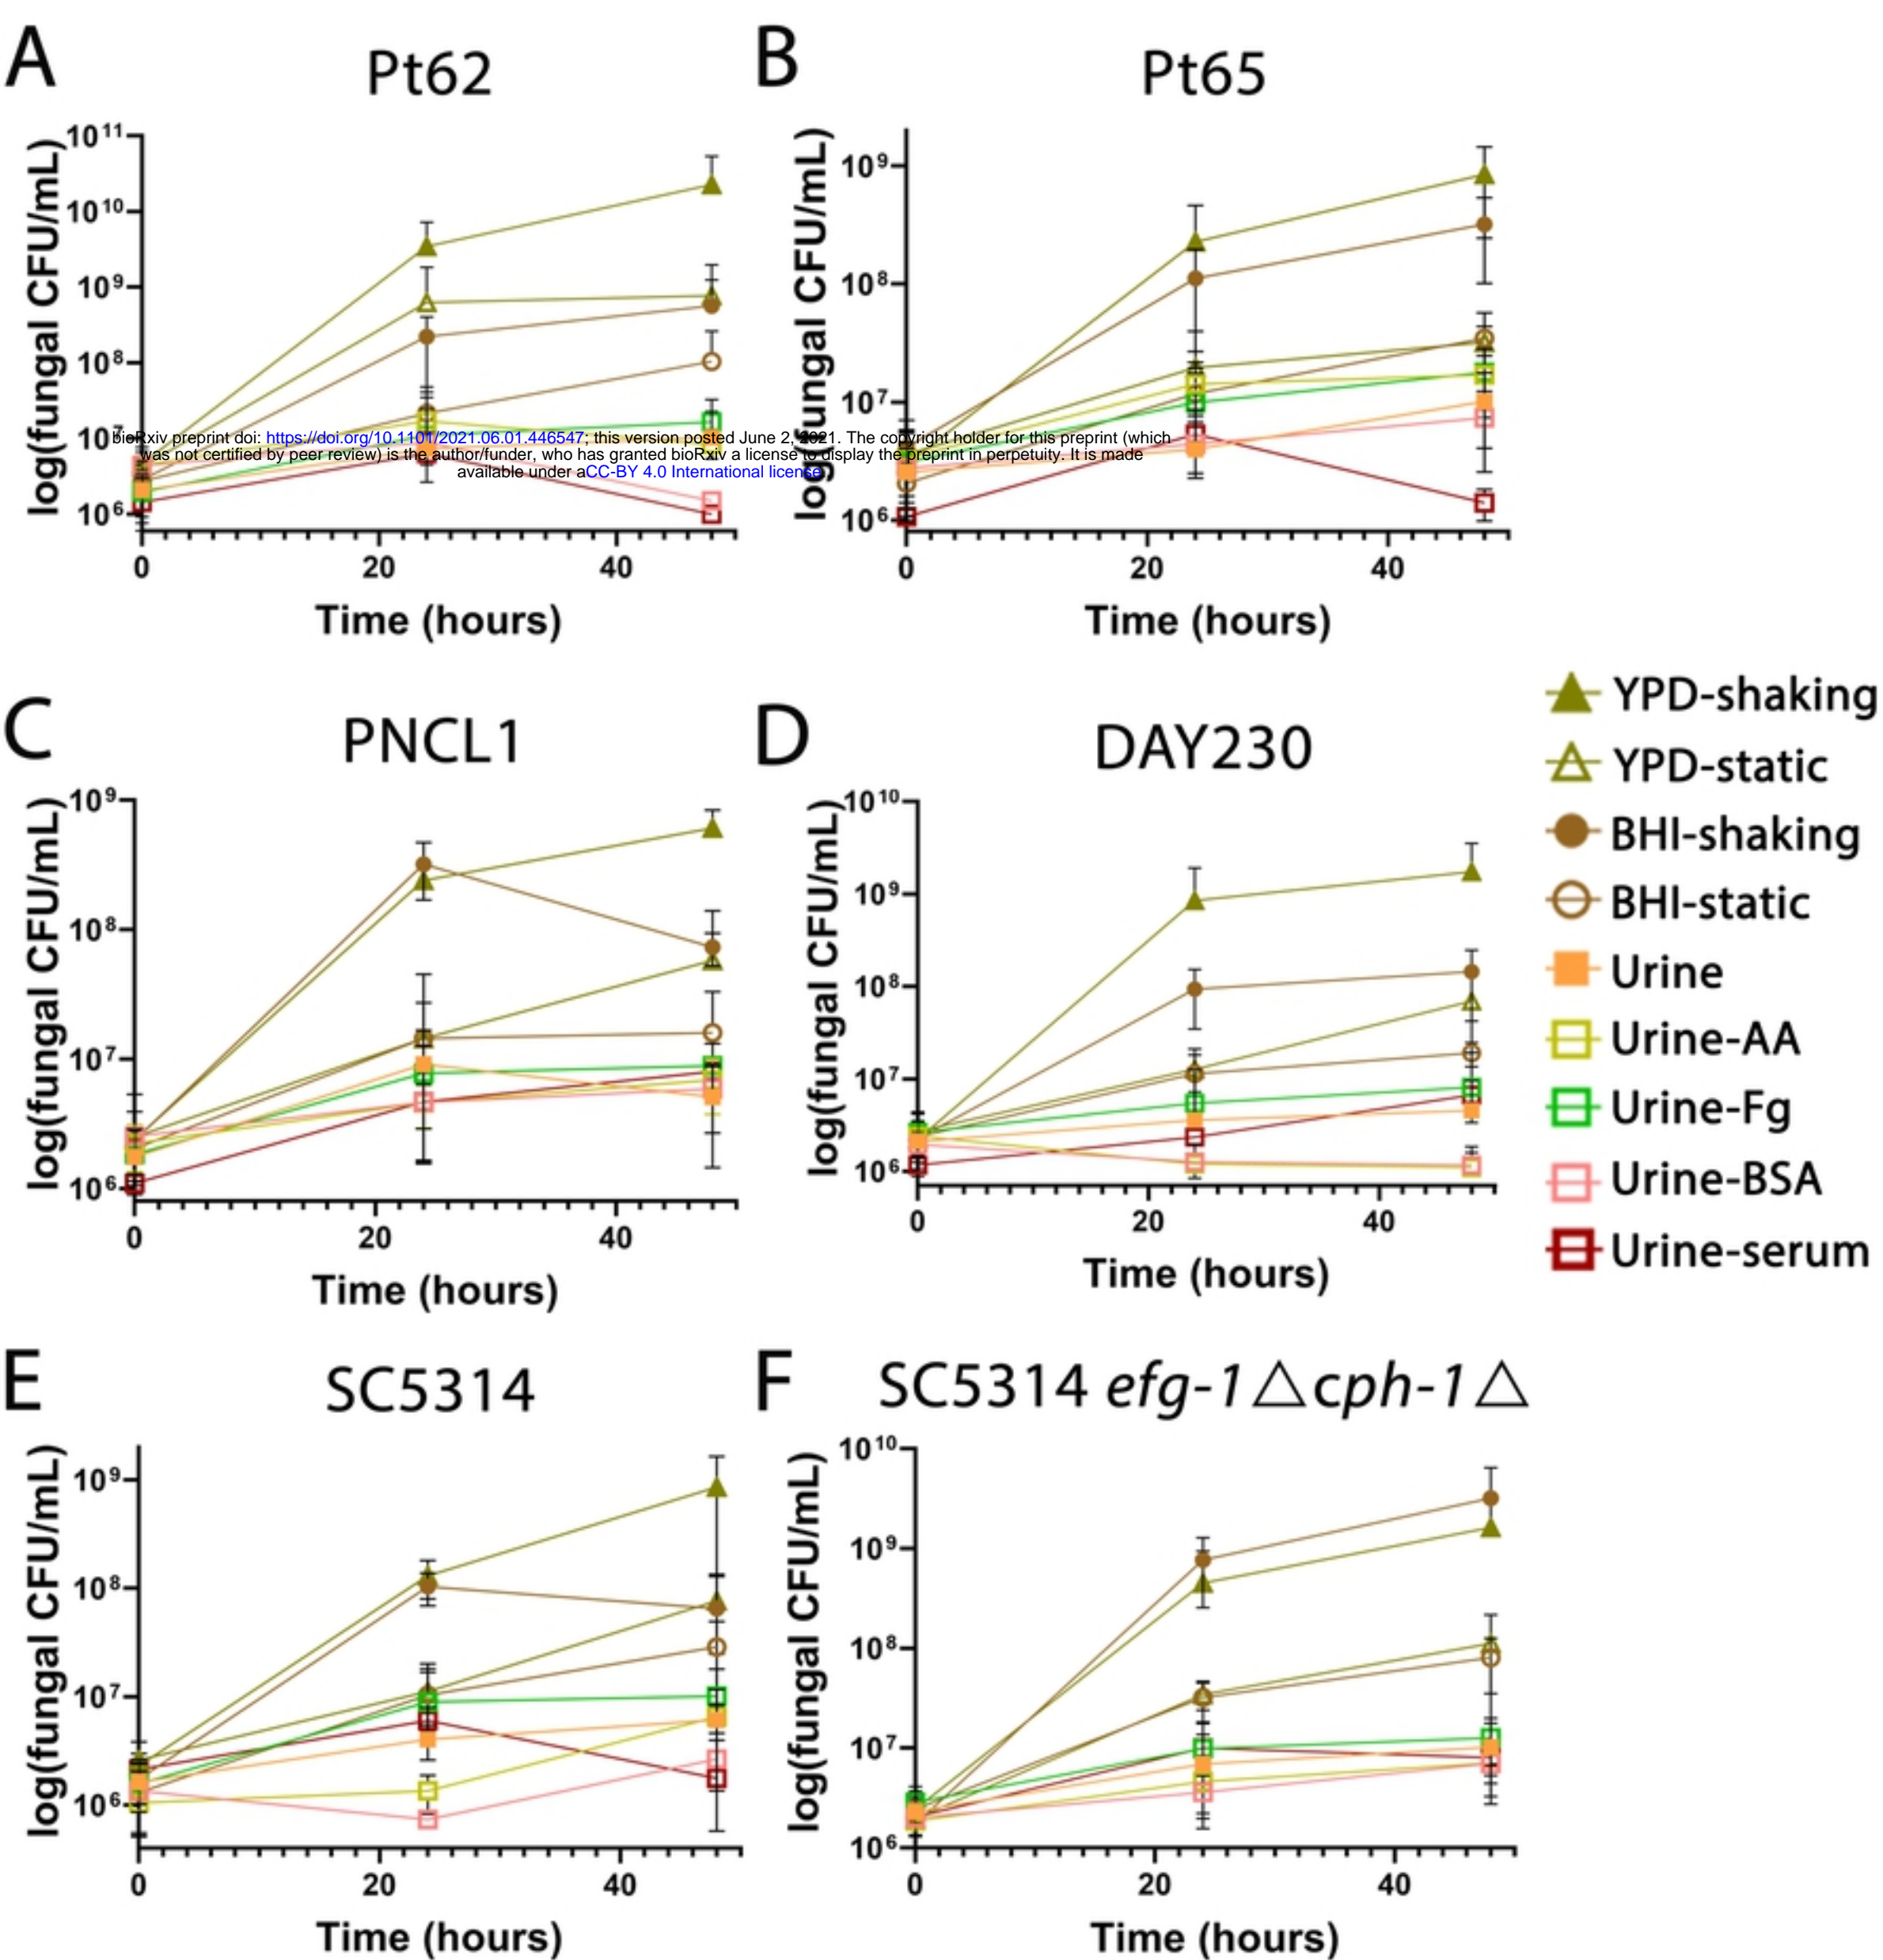

Figure 1

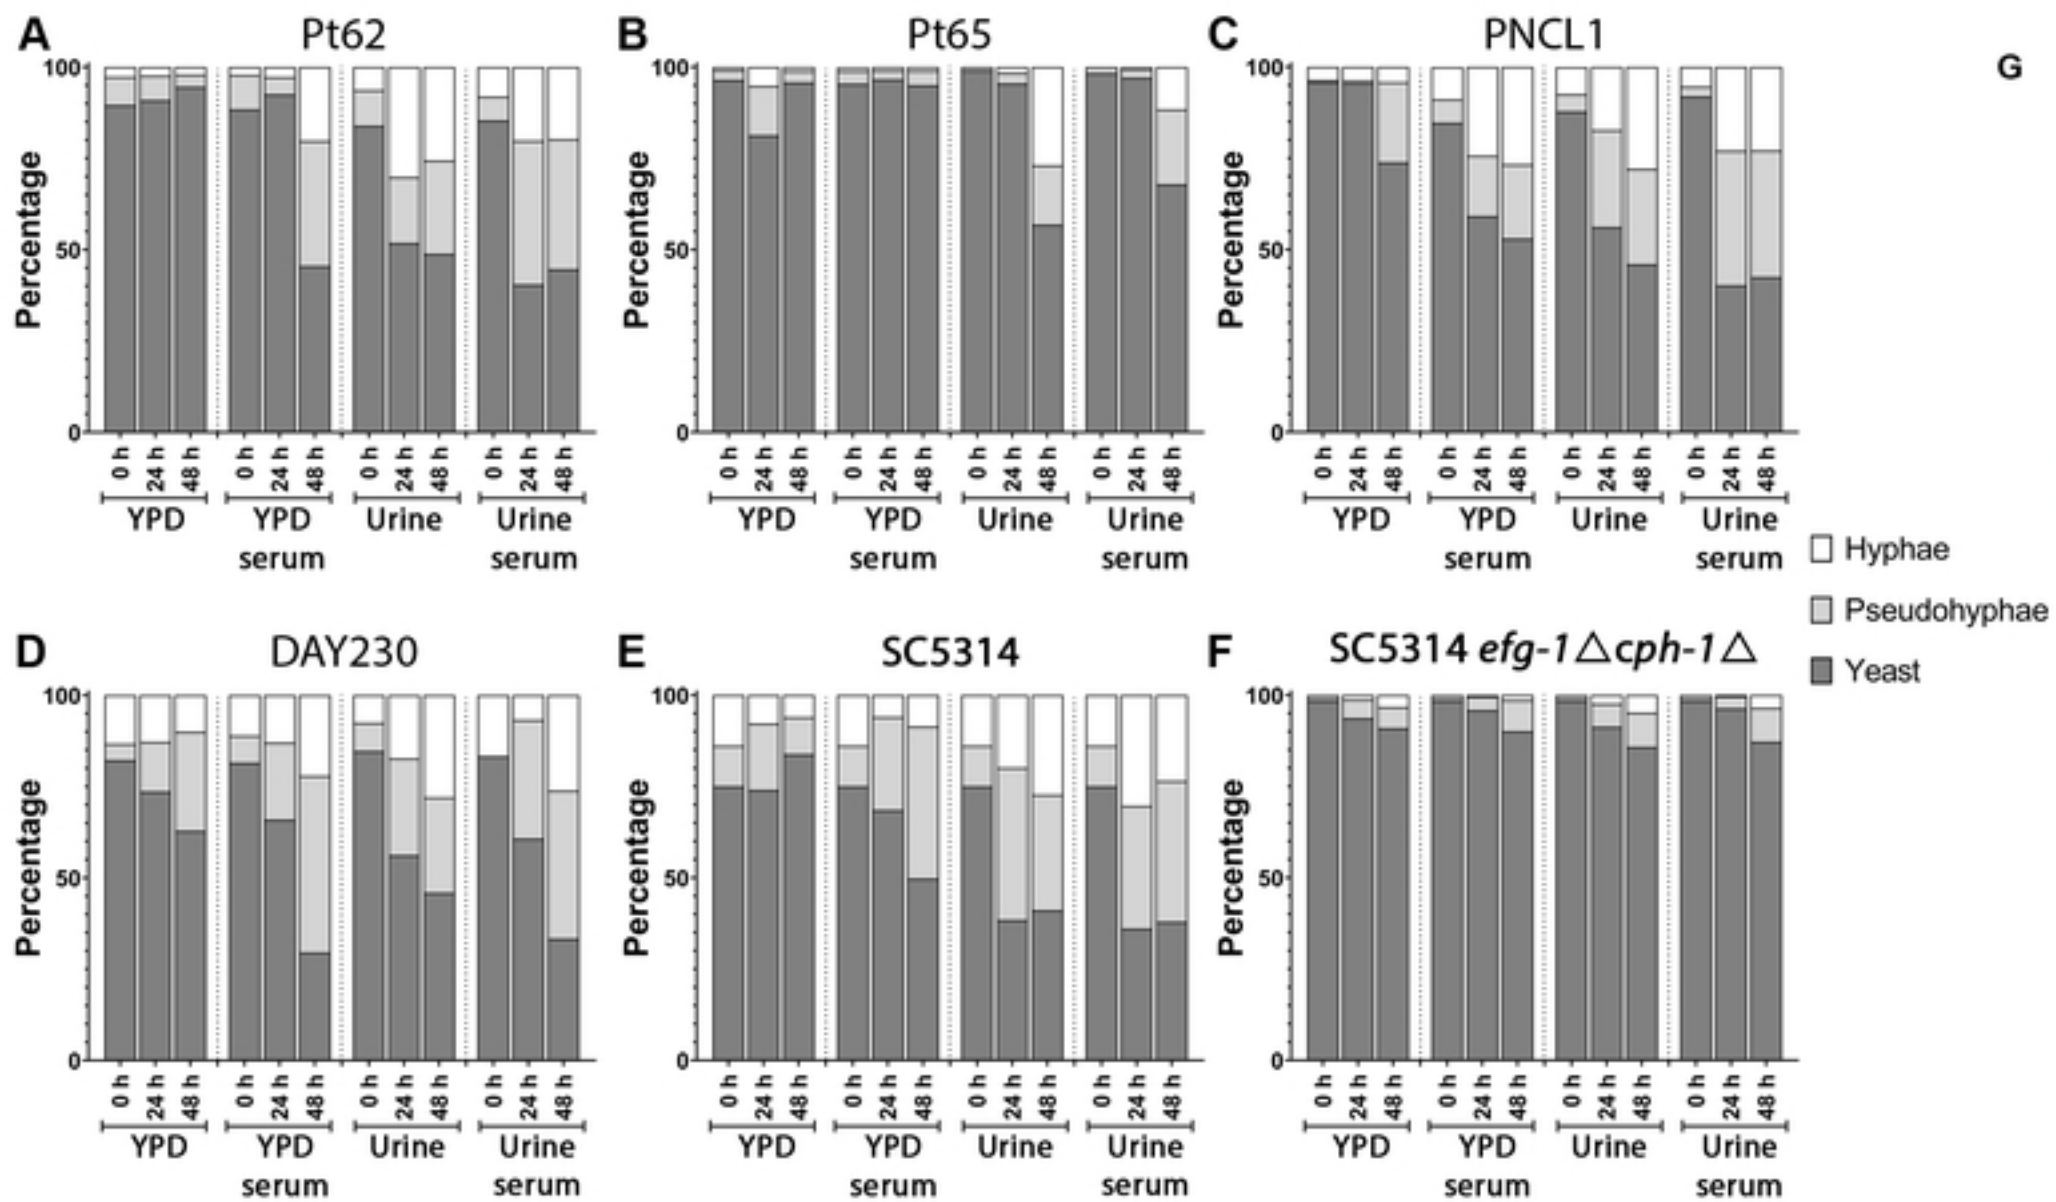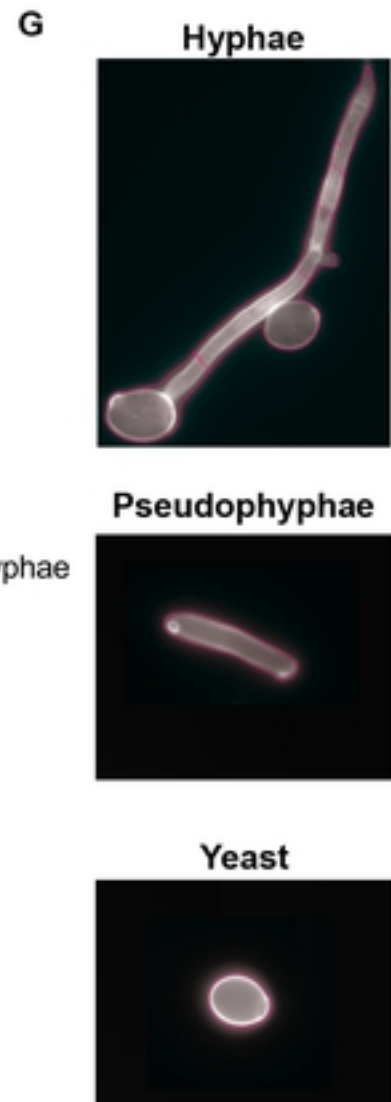

Figure 2



# Biofilms

## BSA-urine

## Fg-urine

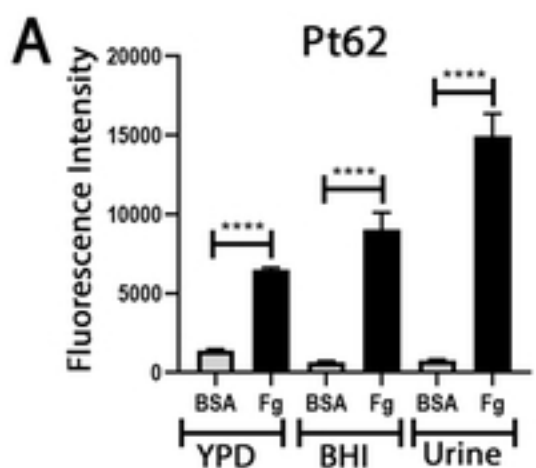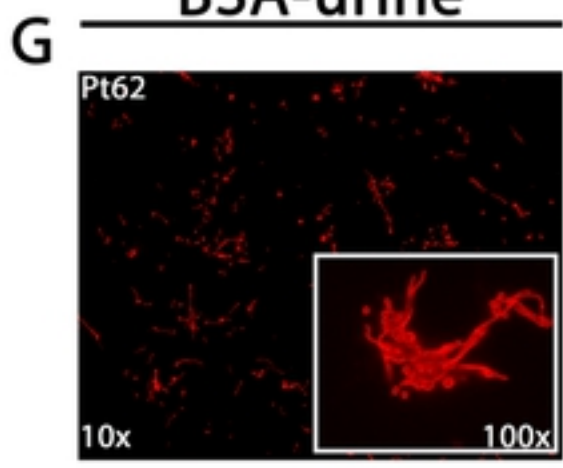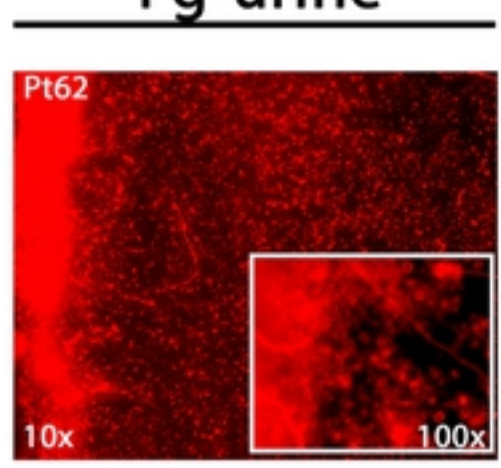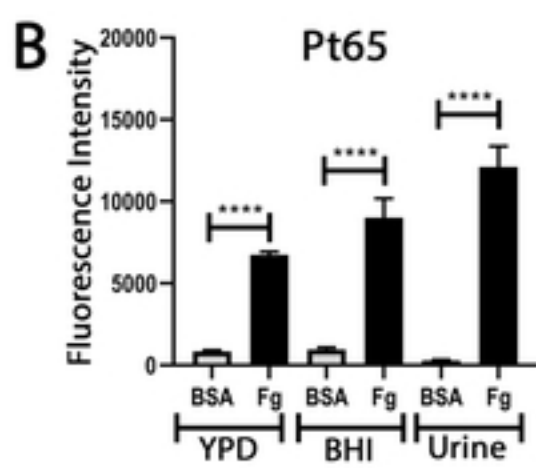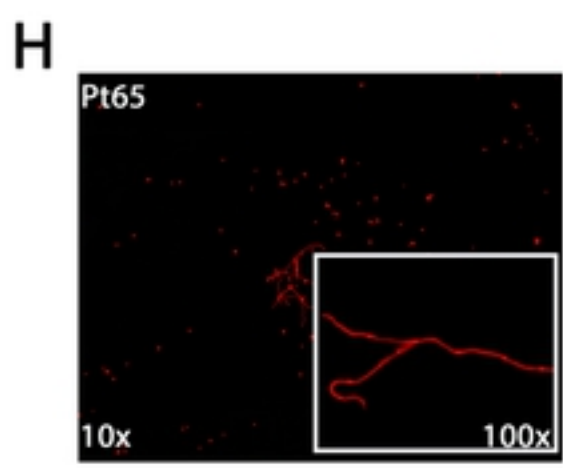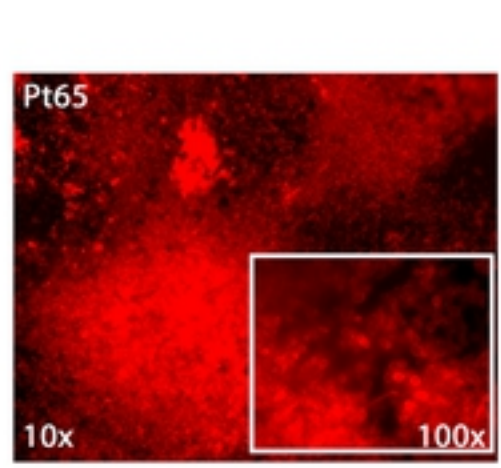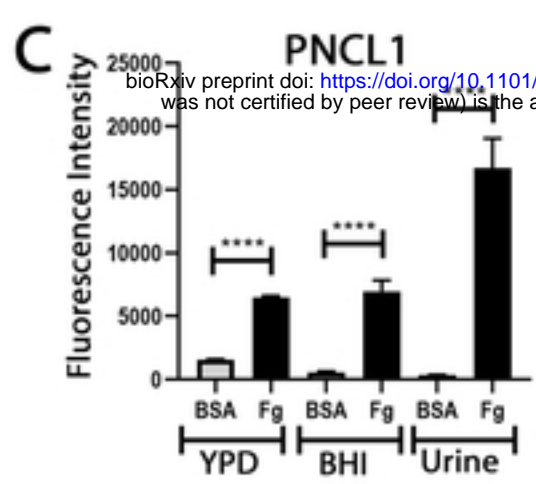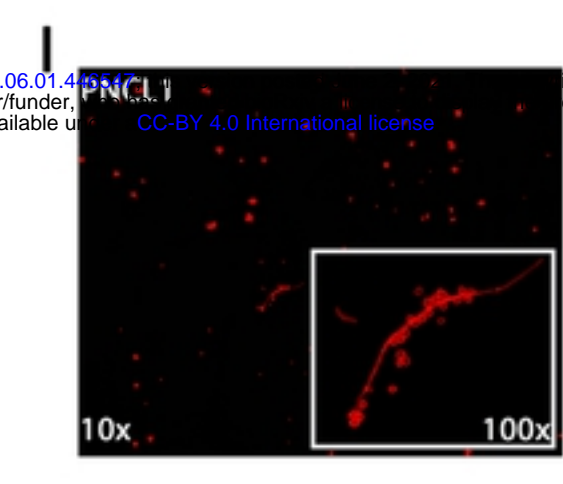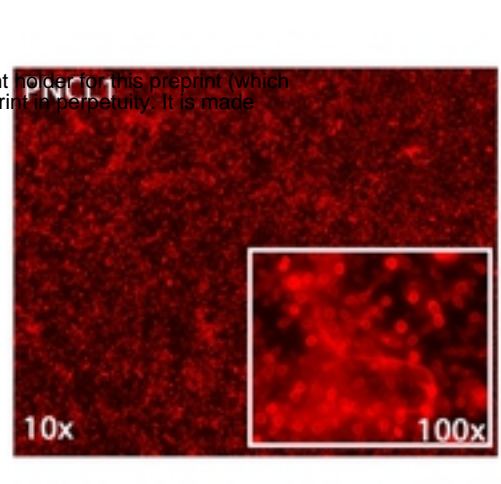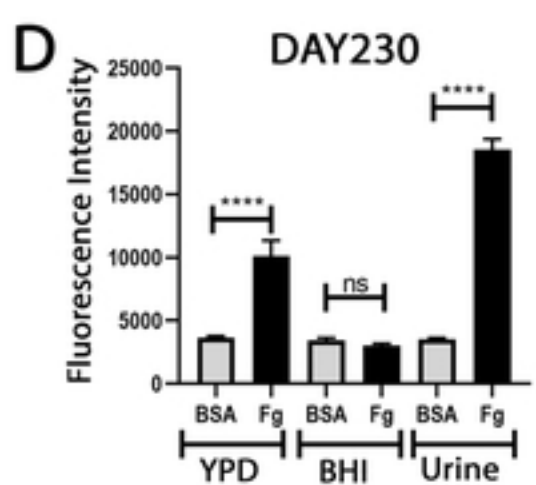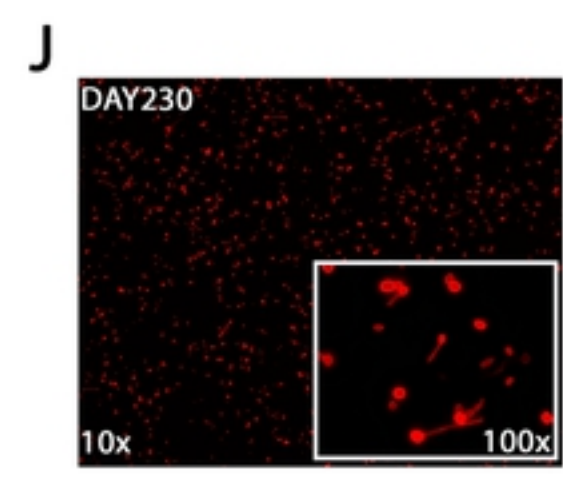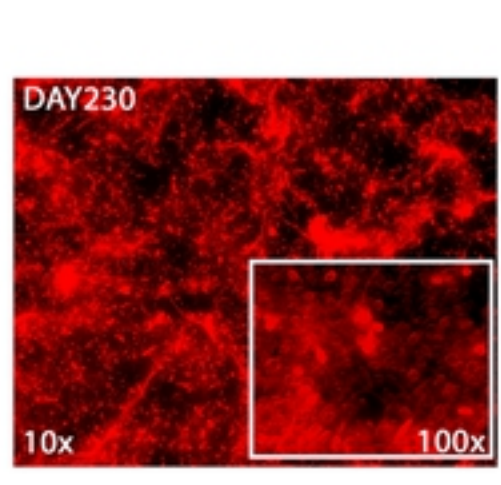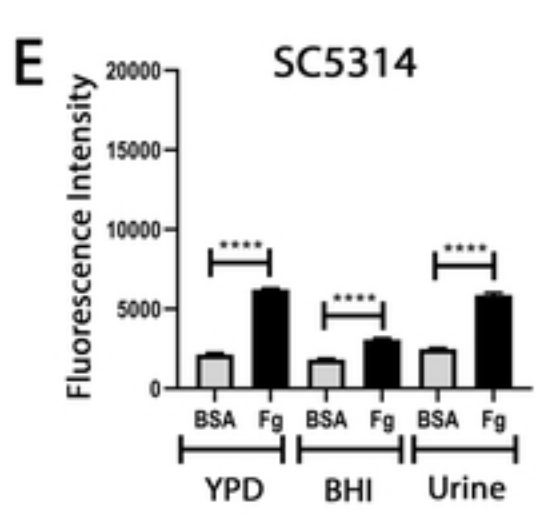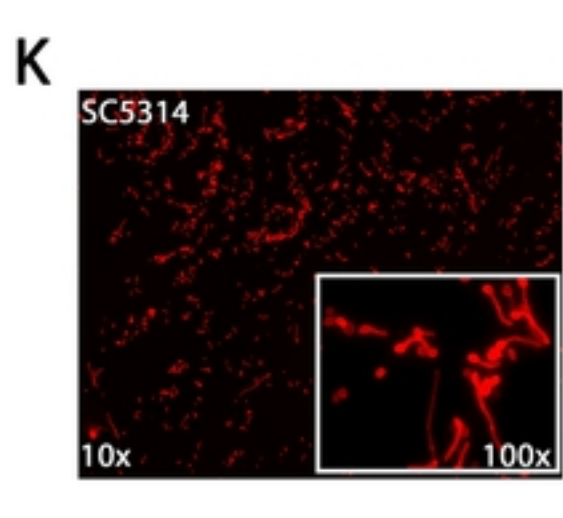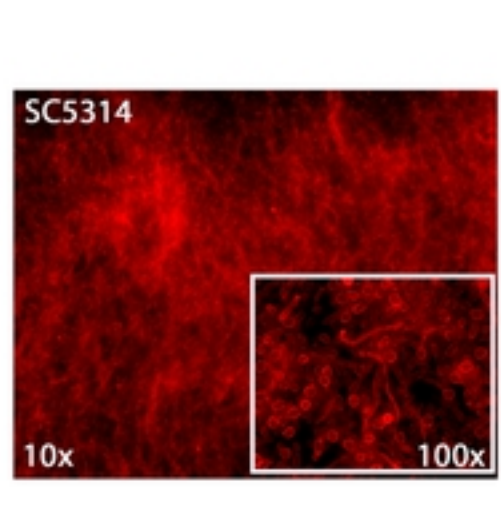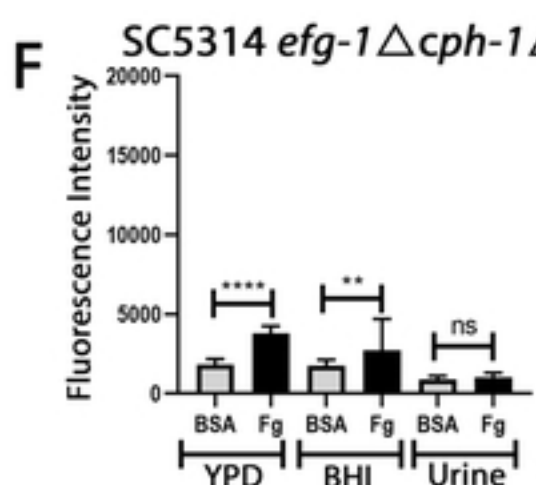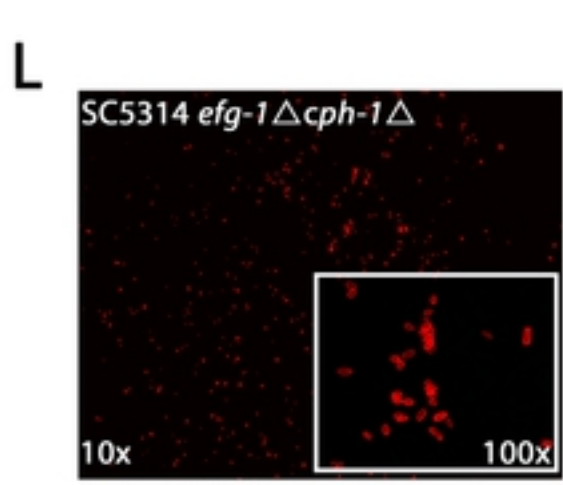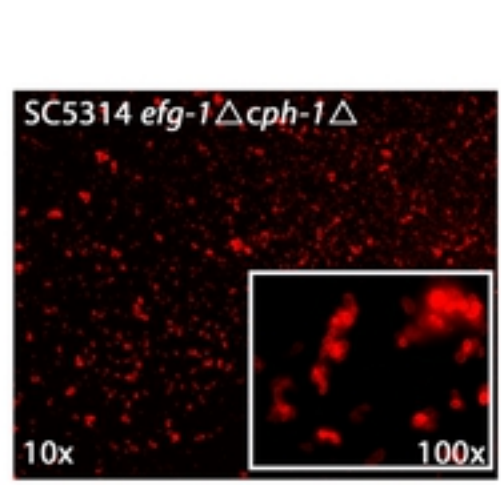

Figure 3



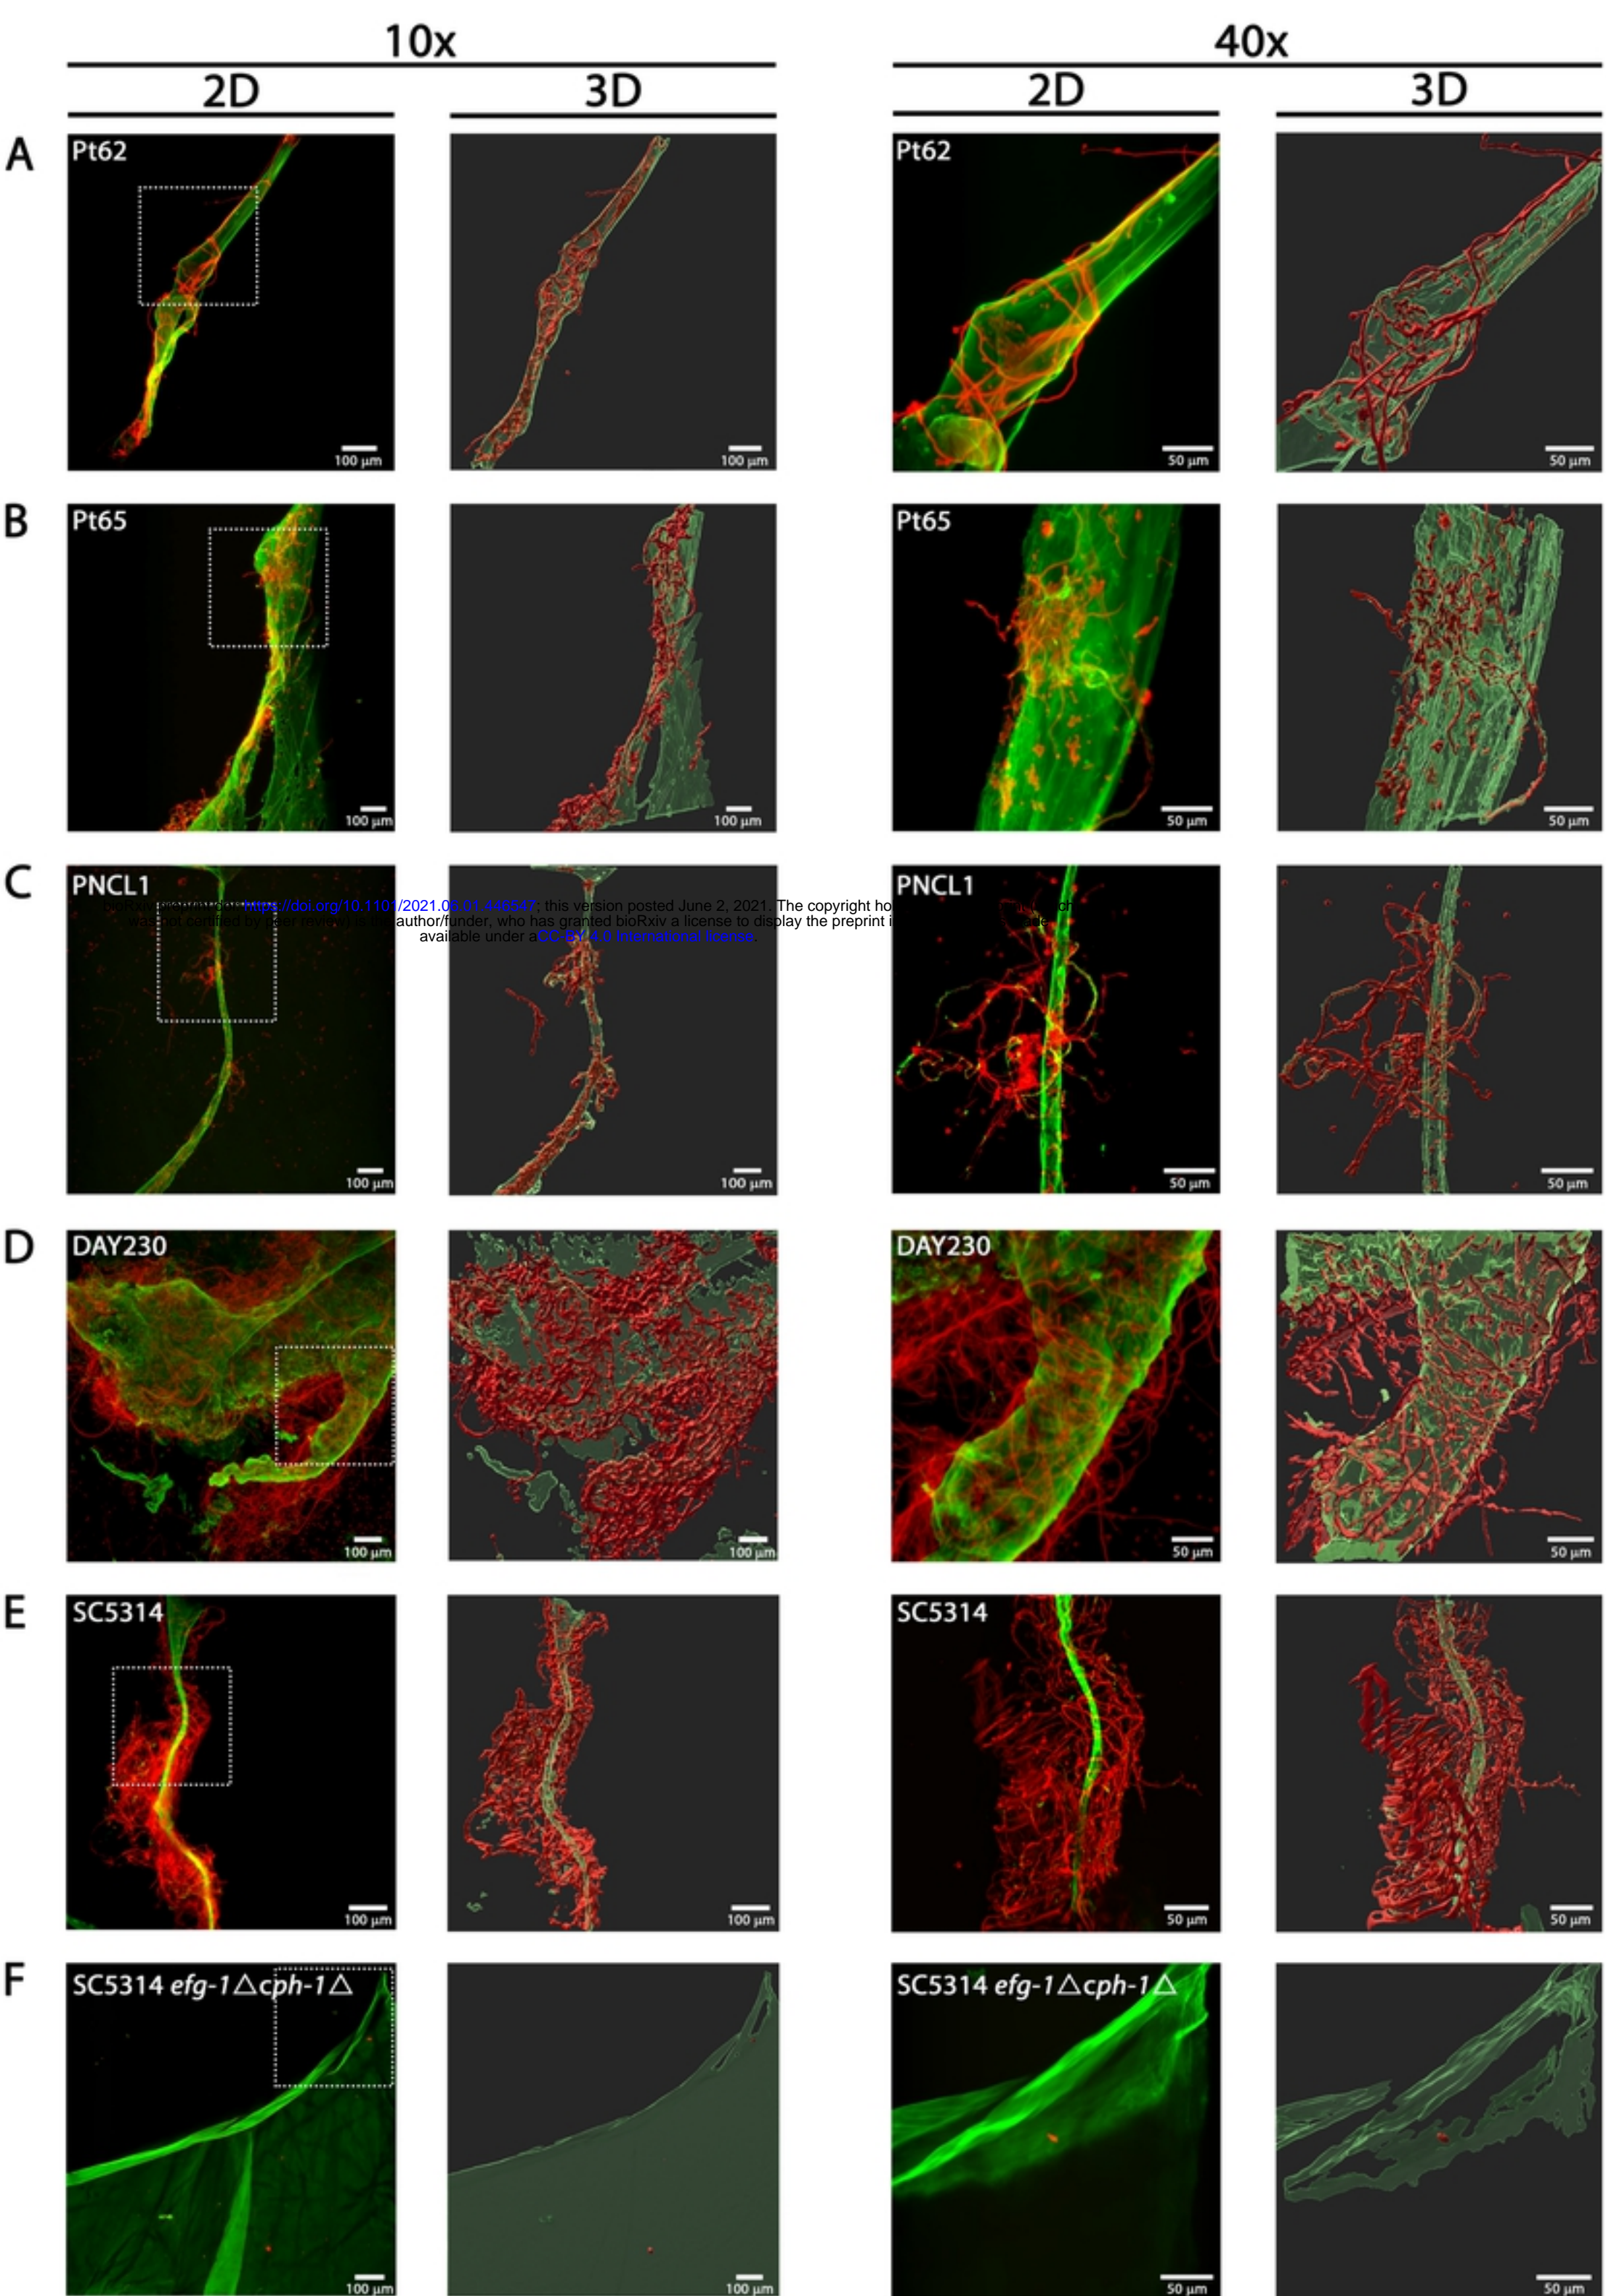

Figure 4



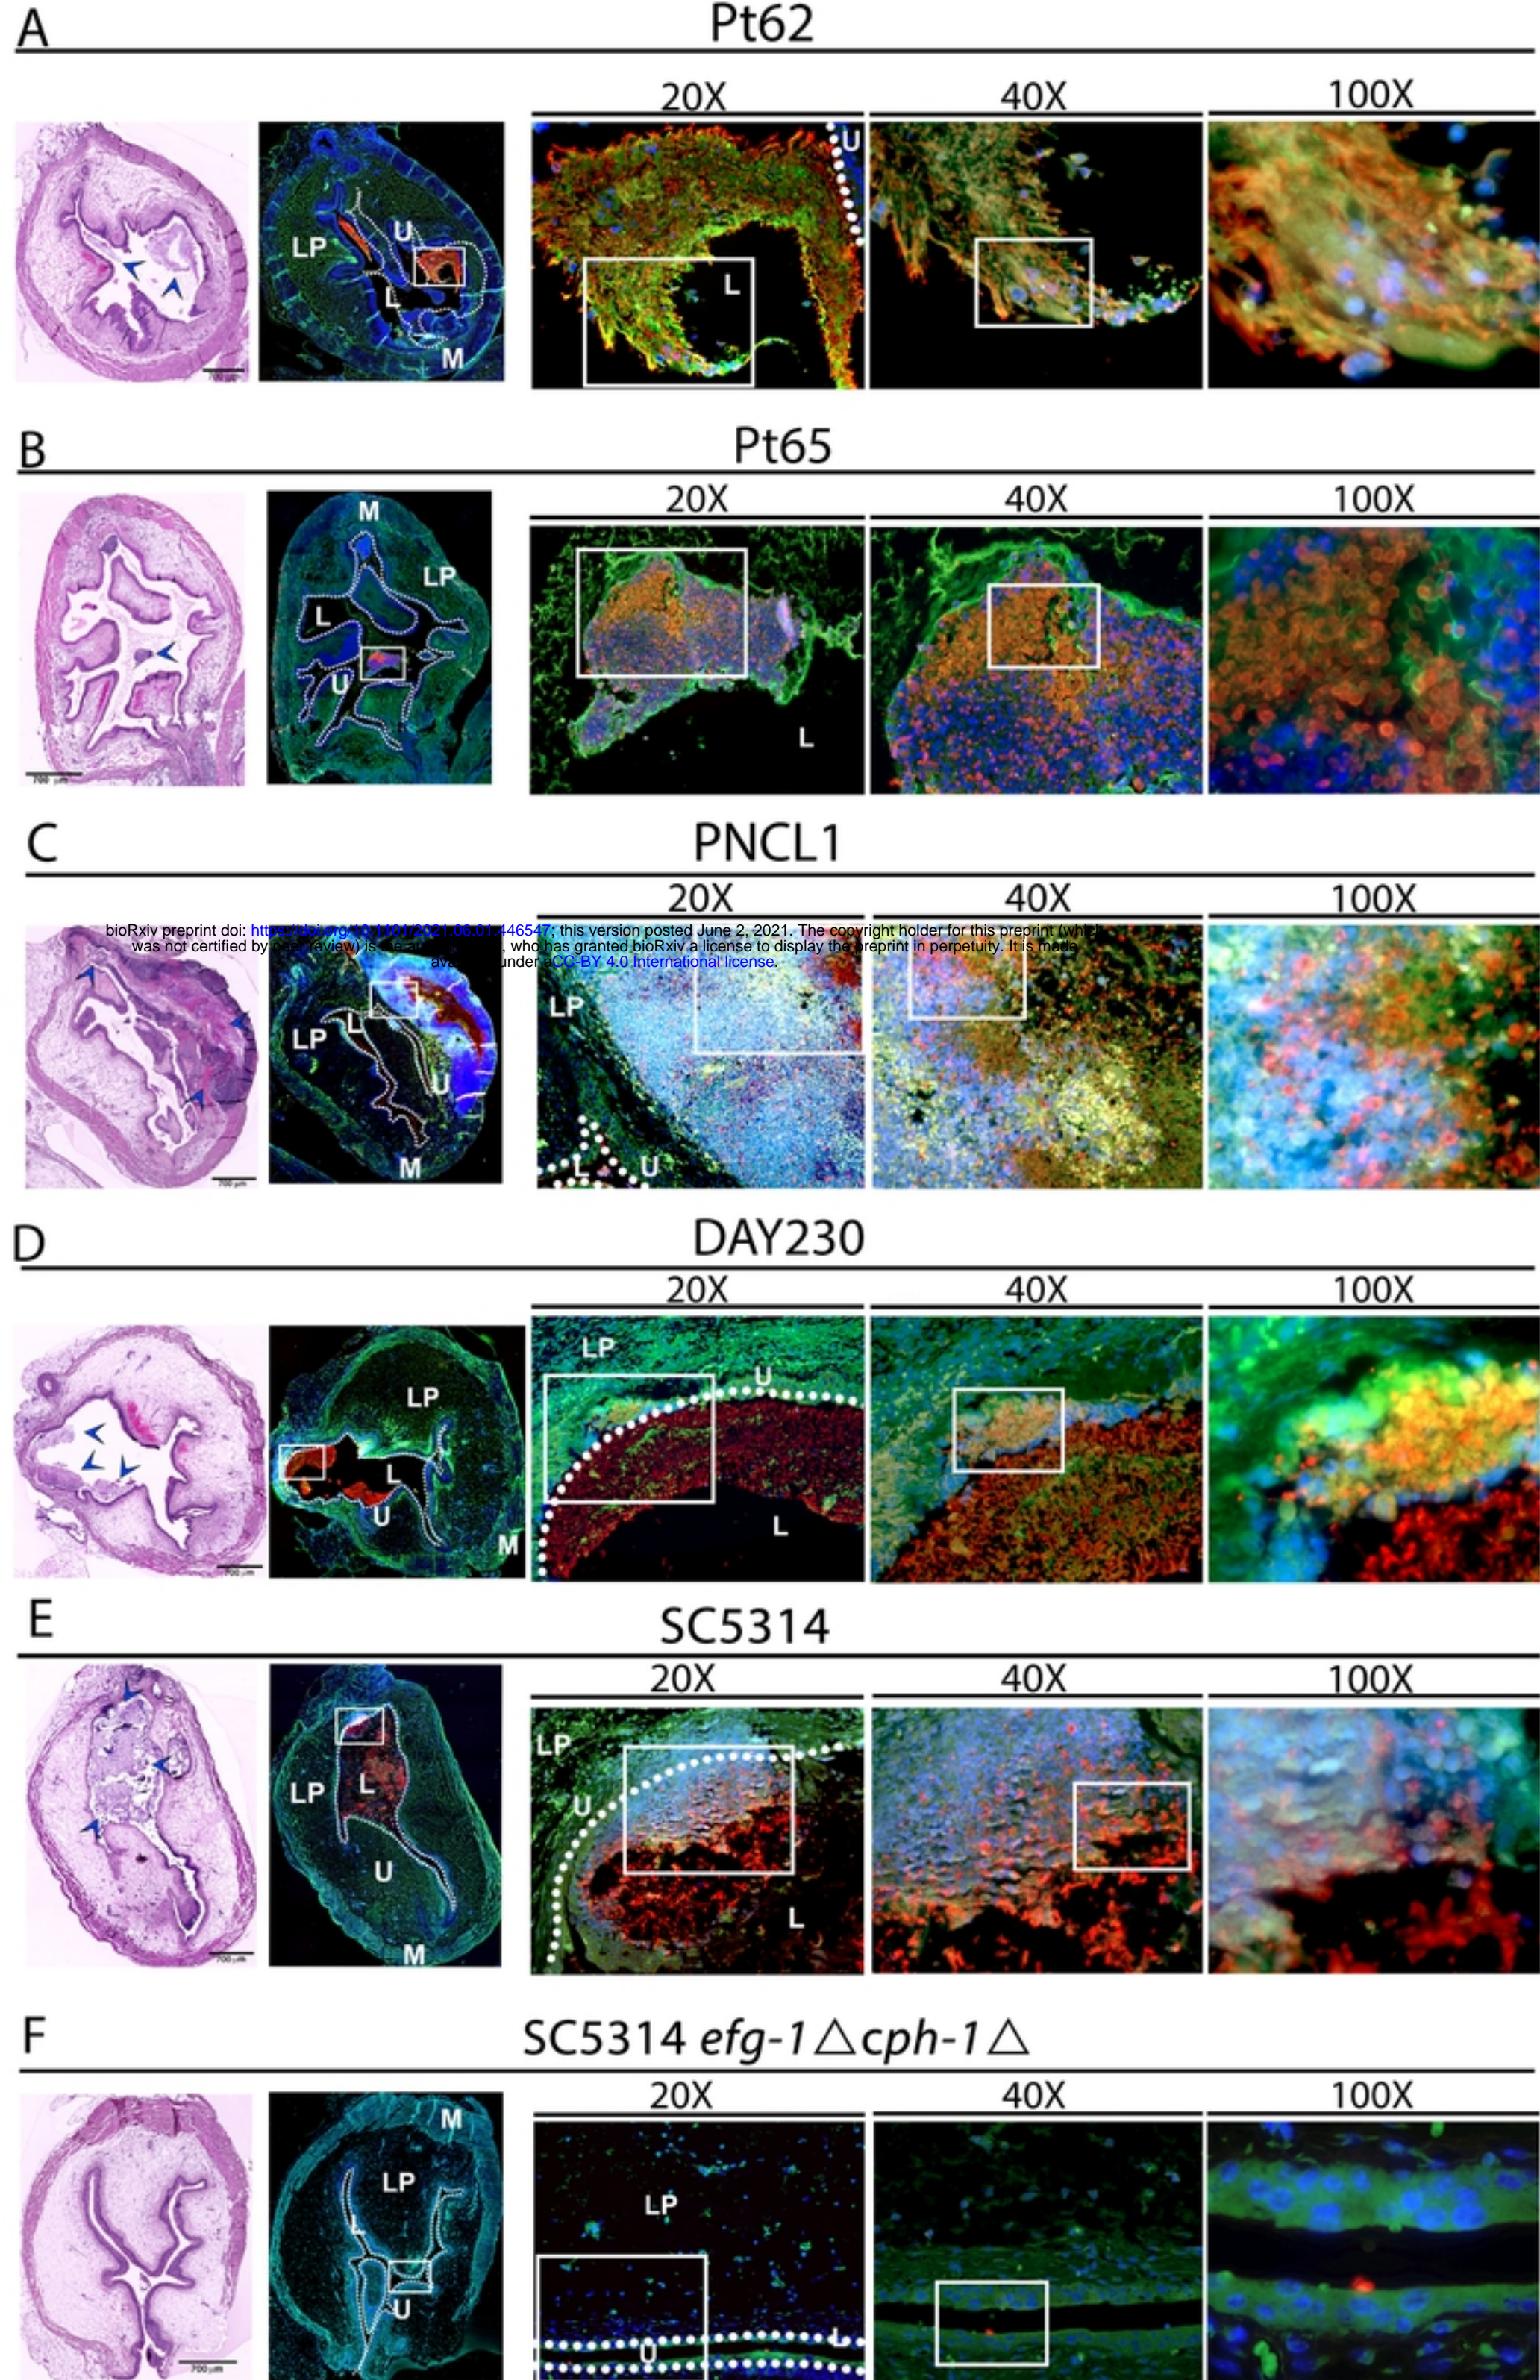

Figure 6



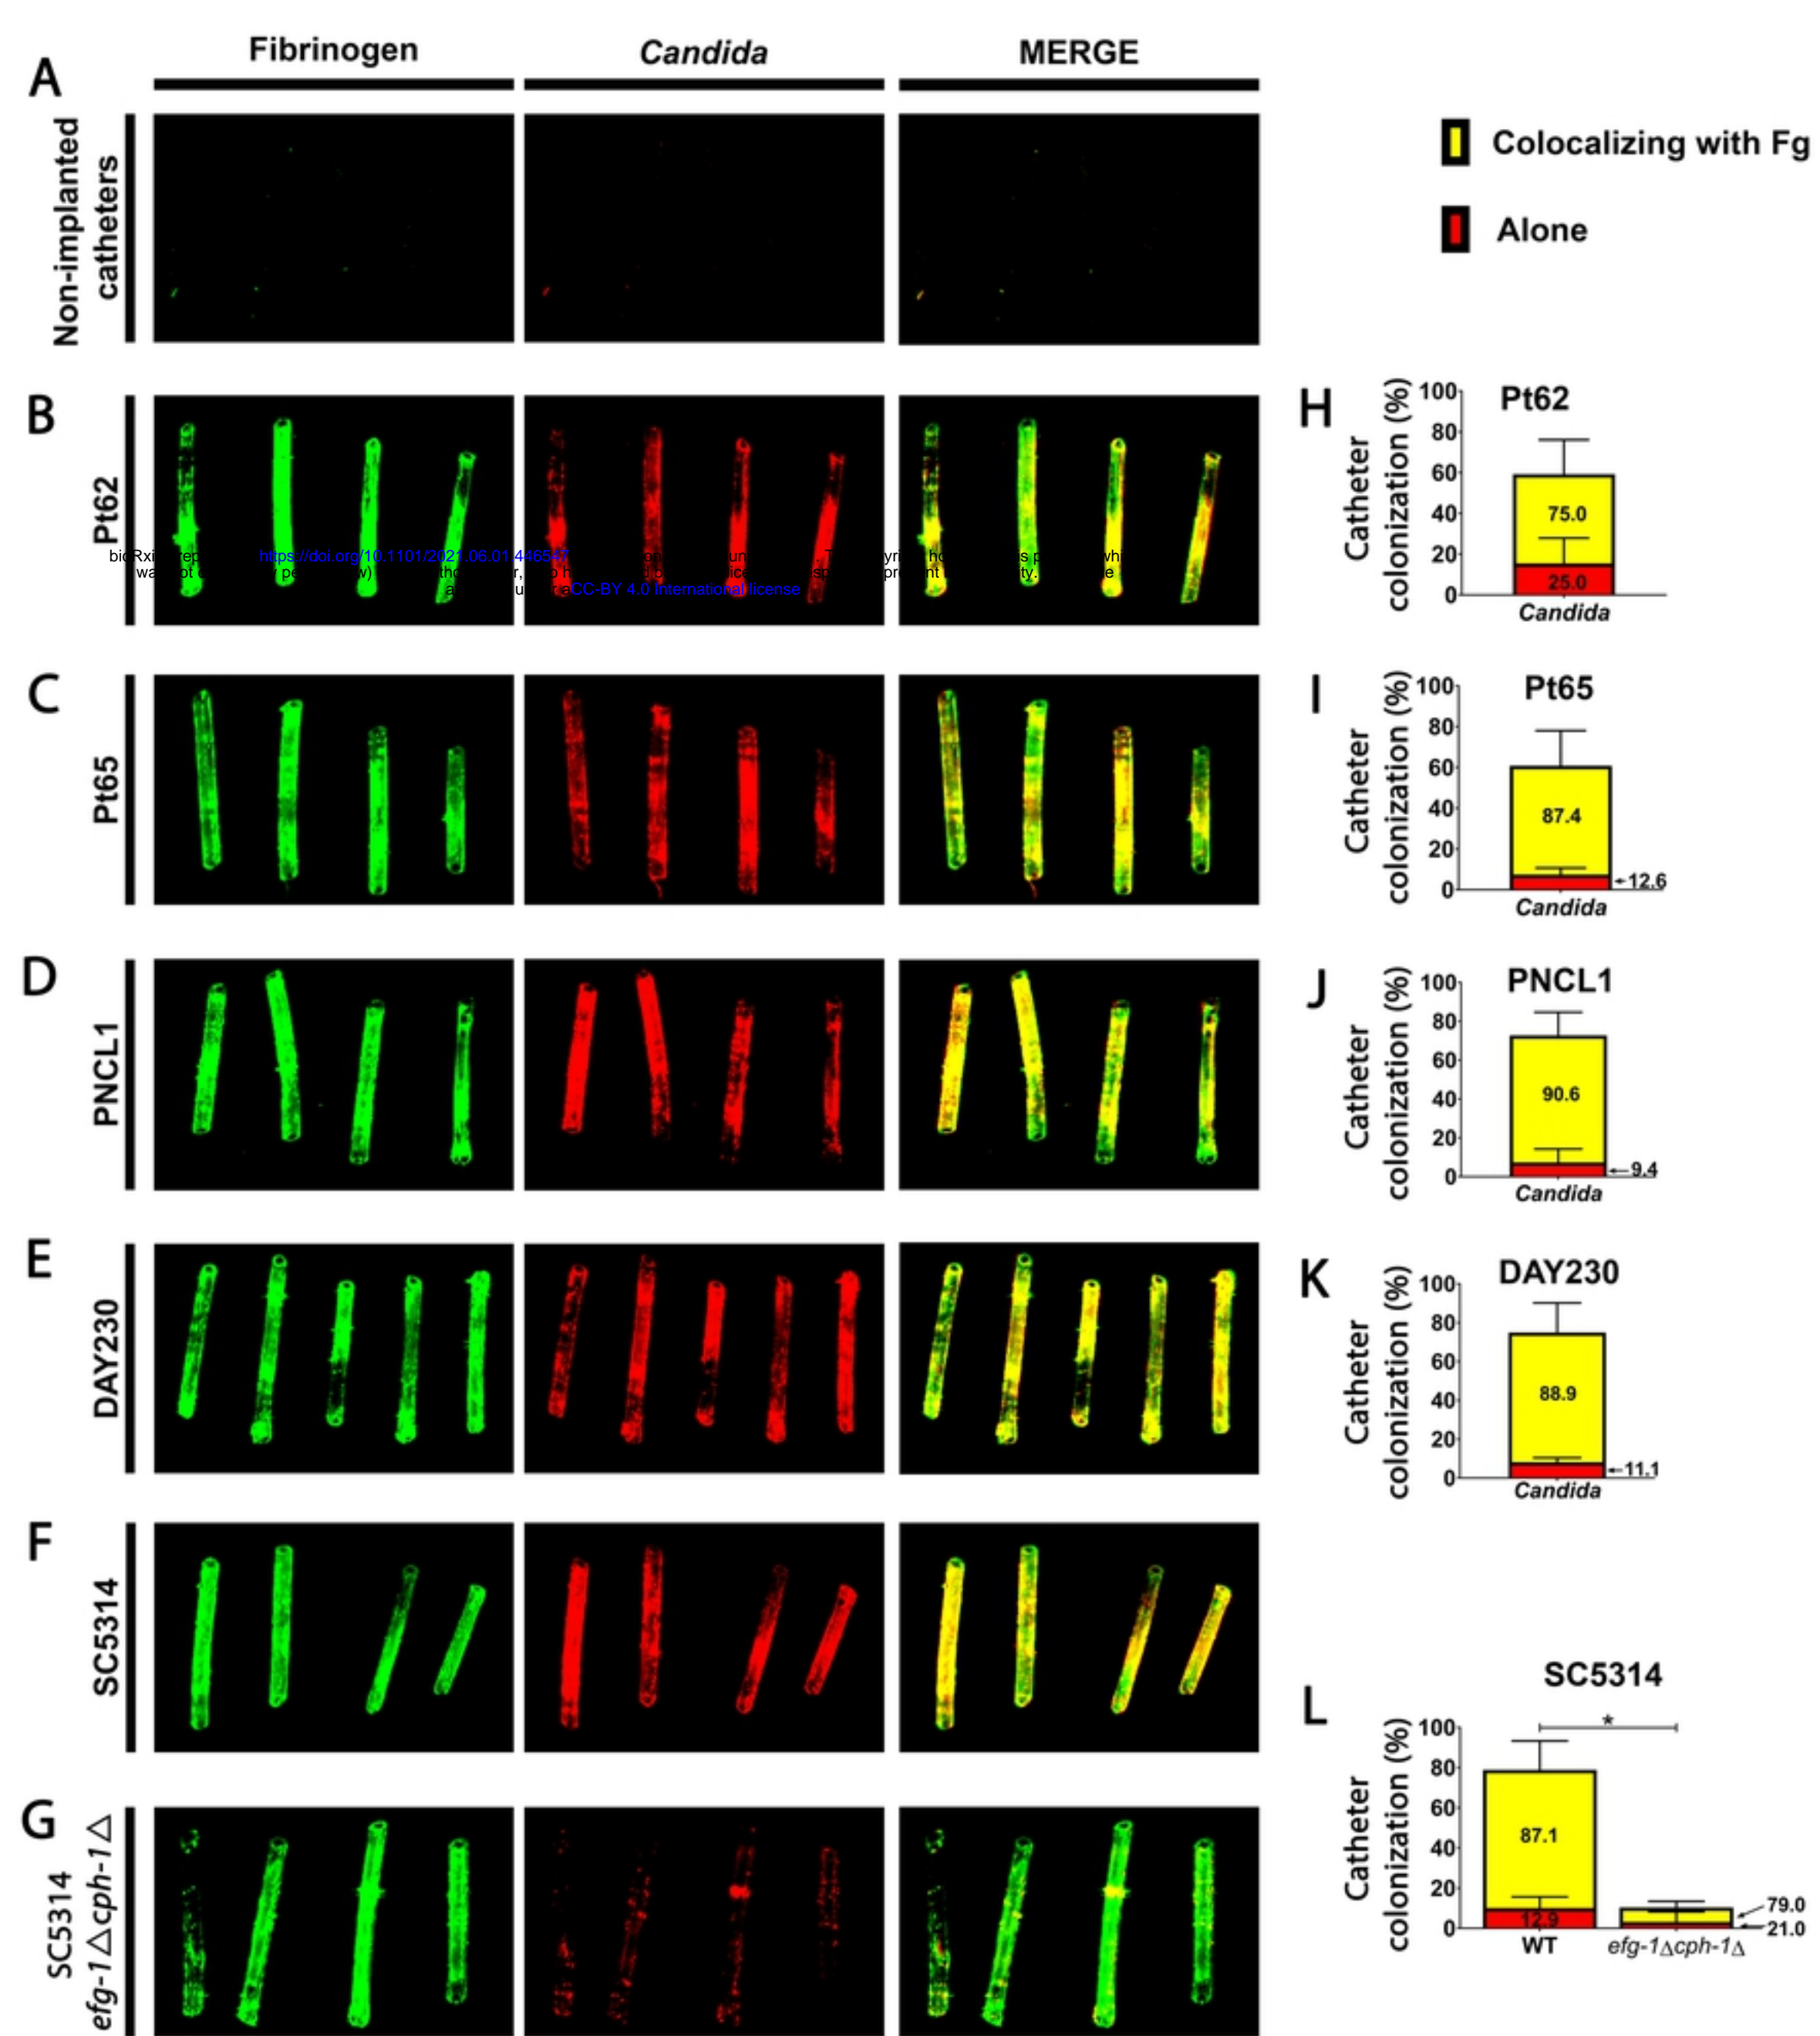

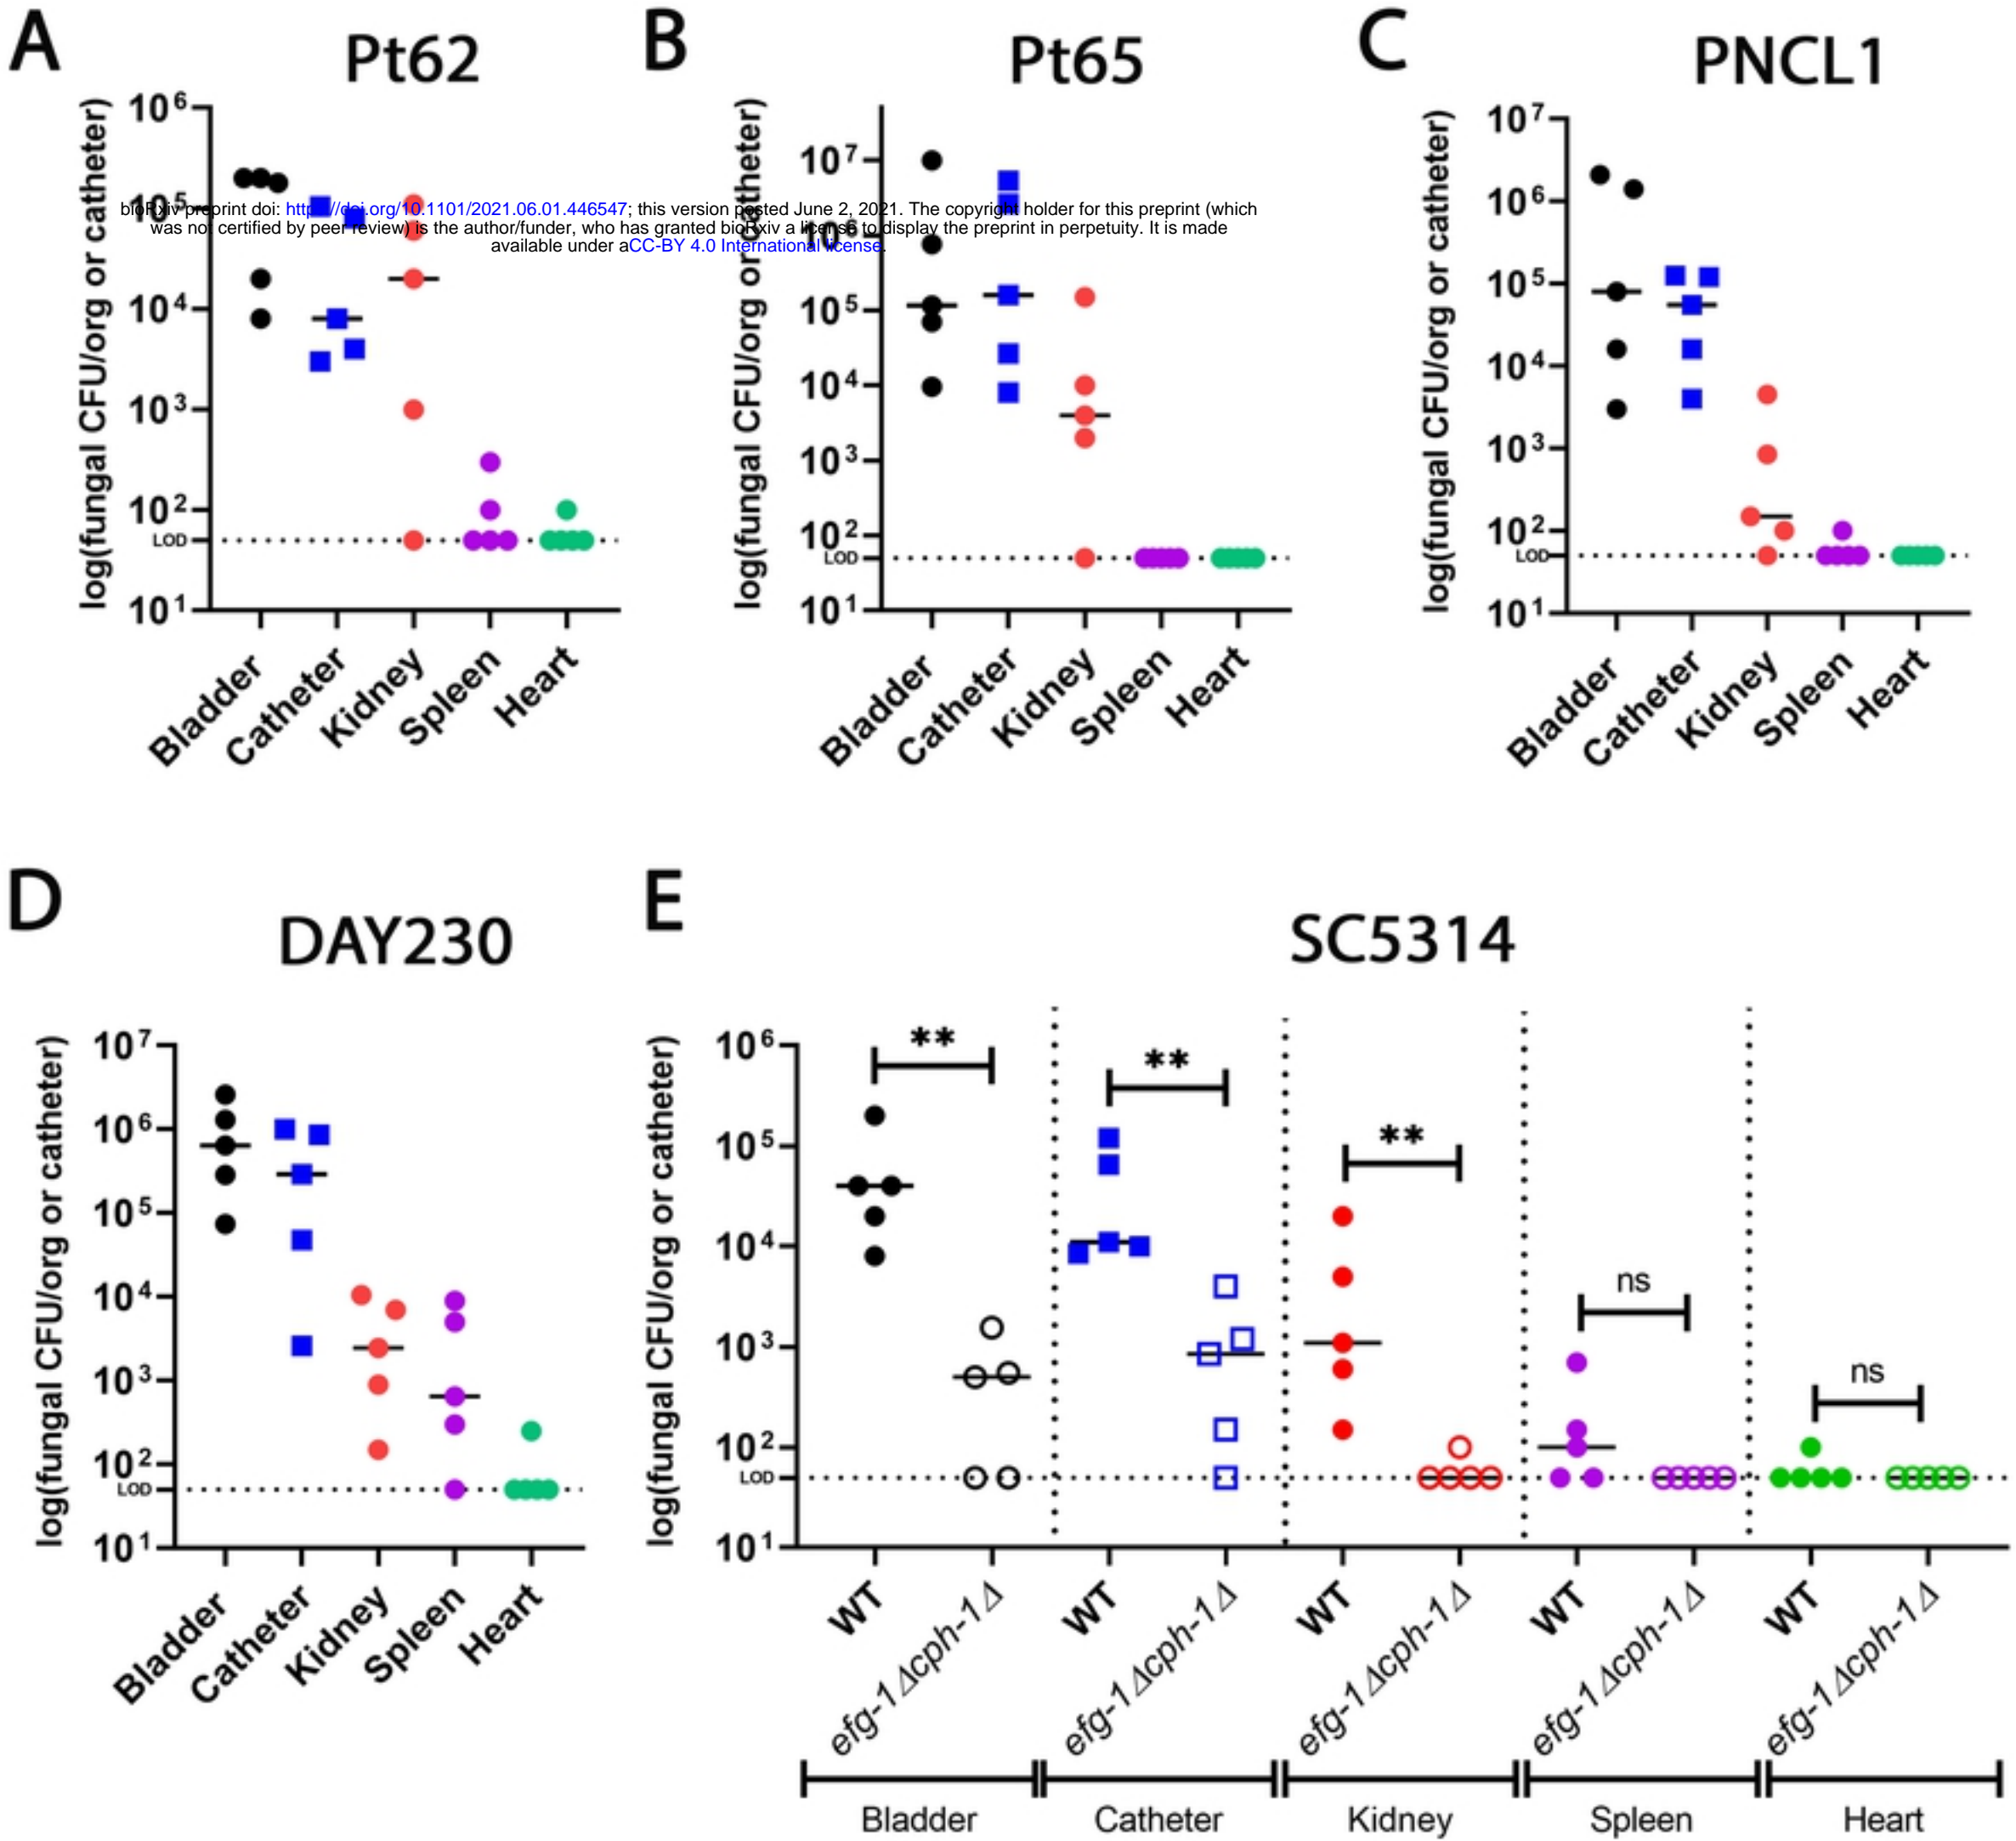

Figure 5
